# Supplementary material for: Federated target trial emulation for time-to-event outcomes via POLARIS: Pooled-equivalent One-shot Likelihood Aggregation for Real-world Inference in Survival
Source: Research Square preprint supplement (doi:10.21203/rs.3.rs-9613167/v1), 2026-05-20
Supplement: Supplementary file 1 [file 133e108e6d6cfdd08a909192.xlsx]

## Sheet: glp1 vs sglt2
outcome	modifier	n_sites	total_patients	HR_beta1	HR_beta1_CI_lower	HR_beta1_CI_upper	HR_beta1_CI	HR_beta1_beta3	HR_beta1_beta3_CI_lower	HR_beta1_beta3_CI_upper	HR_beta1_beta3_CI
visits_abdominal_pain	ethnicity_binary	4	52569	1.15179	0.926125	1.43244	1.152 (0.926, 1.432)	1.0681	0.874752	1.30418	1.068 (0.875, 1.304)
visits_constipation	ethnicity_binary	4	52569	1.01998	0.812164	1.28097	1.020 (0.812, 1.281)	1.13475	0.927802	1.38786	1.135 (0.928, 1.388)
visits_gerd	ethnicity_binary	4	52569	1.14601	0.922709	1.42336	1.146 (0.923, 1.423)	1.11969	0.918029	1.36565	1.120 (0.918, 1.366)
visits_nausea	ethnicity_binary	4	52569	1.01601	0.797886	1.29376	1.016 (0.798, 1.294)	1.13002	0.921623	1.38553	1.130 (0.922, 1.386)
visits_vomiting	ethnicity_binary	4	52569	1.00982	0.768527	1.32687	1.010 (0.769, 1.327)	1.22291	0.993545	1.50523	1.223 (0.994, 1.505)
visits_abdominal_pain	gender_binary	4	52569	1.0276	0.839432	1.25796	1.028 (0.839, 1.258)	1.14558	0.935617	1.40267	1.146 (0.936, 1.403)
visits_constipation	gender_binary	4	52569	1.02467	0.834458	1.25823	1.025 (0.834, 1.258)	1.23129	1.00297	1.51158	1.231 (1.003, 1.512)
visits_gerd	gender_binary	4	52569	1.08245	0.885233	1.32361	1.082 (0.885, 1.324)	1.15826	0.948187	1.41488	1.158 (0.948, 1.415)
visits_nausea	gender_binary	4	52569	1.08634	0.882689	1.33698	1.086 (0.883, 1.337)	1.16977	0.946587	1.44557	1.170 (0.947, 1.446)
visits_vomiting	gender_binary	4	52569	1.12234	0.902945	1.39503	1.122 (0.903, 1.395)	1.27732	1.0302	1.58372	1.277 (1.030, 1.584)
visits_abdominal_pain	lab_bmi_binary	4	52569	1.16514	0.944832	1.43681	1.165 (0.945, 1.437)	1.05816	0.866274	1.29255	1.058 (0.866, 1.293)
visits_constipation	lab_bmi_binary	4	52569	1.17832	0.951341	1.45946	1.178 (0.951, 1.459)	1.10306	0.901171	1.35017	1.103 (0.901, 1.350)
visits_gerd	lab_bmi_binary	4	52569	1.08657	0.884433	1.33491	1.087 (0.884, 1.335)	1.13118	0.927061	1.38023	1.131 (0.927, 1.380)
visits_nausea	lab_bmi_binary	4	52569	1.1705	0.934081	1.46676	1.171 (0.934, 1.467)	1.09979	0.896276	1.34951	1.100 (0.896, 1.350)
visits_vomiting	lab_bmi_binary	4	52569	1.19065	0.941595	1.50557	1.191 (0.942, 1.506)	1.20082	0.973586	1.4811	1.201 (0.974, 1.481)
visits_abdominal_pain	lab_hba1c_binary	4	52569	1.04563	0.855221	1.27843	1.046 (0.855, 1.278)	1.14405	0.932426	1.40371	1.144 (0.932, 1.404)
visits_constipation	lab_hba1c_binary	4	52569	1.06337	0.867975	1.30276	1.063 (0.868, 1.303)	1.2568	1.0192	1.54978	1.257 (1.019, 1.550)
visits_gerd	lab_hba1c_binary	4	52569	1.08016	0.884943	1.31843	1.080 (0.885, 1.318)	1.23386	1.00684	1.51206	1.234 (1.007, 1.512)
visits_nausea	lab_hba1c_binary	4	52569	1.08544	0.882838	1.33453	1.085 (0.883, 1.335)	1.16941	0.944044	1.44857	1.169 (0.944, 1.449)
visits_vomiting	lab_hba1c_binary	4	52569	1.12663	0.910455	1.39414	1.127 (0.910, 1.394)	1.3181	1.05659	1.64434	1.318 (1.057, 1.644)
visits_abdominal_pain	med_lipid	4	52569	1.10869	0.907308	1.35477	1.109 (0.907, 1.355)	1.0204	0.829837	1.25472	1.020 (0.830, 1.255)
visits_constipation	med_lipid	4	52569	1.07703	0.87904	1.31961	1.077 (0.879, 1.320)	1.21177	0.983399	1.49317	1.212 (0.983, 1.493)
visits_gerd	med_lipid	4	52569	1.15582	0.946996	1.4107	1.156 (0.947, 1.411)	1.04536	0.852719	1.28152	1.045 (0.853, 1.282)
visits_nausea	med_lipid	4	52569	1.08562	0.884162	1.33297	1.086 (0.884, 1.333)	1.20103	0.96405	1.49628	1.201 (0.964, 1.496)
visits_vomiting	med_lipid	4	52569	1.11711	0.904014	1.38045	1.117 (0.904, 1.380)	1.37285	1.09638	1.71902	1.373 (1.096, 1.719)
visits_abdominal_pain	med_metformin	4	52569	1.07531	0.880109	1.31381	1.075 (0.880, 1.314)	1.09237	0.887562	1.34443	1.092 (0.888, 1.344)
visits_constipation	med_metformin	4	52569	1.12532	0.919127	1.37776	1.125 (0.919, 1.378)	1.09744	0.888035	1.35623	1.097 (0.888, 1.356)
visits_gerd	med_metformin	4	52569	1.12525	0.922143	1.3731	1.125 (0.922, 1.373)	1.09557	0.892496	1.34485	1.096 (0.892, 1.345)
visits_nausea	med_metformin	4	52569	1.10378	0.899053	1.35513	1.104 (0.899, 1.355)	1.13319	0.908861	1.41288	1.133 (0.909, 1.413)
visits_vomiting	med_metformin	4	52569	1.16549	0.944393	1.43835	1.165 (0.944, 1.438)	1.27033	1.00855	1.60007	1.270 (1.009, 1.600)
visits_abdominal_pain	med_opioids	4	52569	1.09479	0.896616	1.33677	1.095 (0.897, 1.337)	1.01287	0.814785	1.2591	1.013 (0.815, 1.259)
visits_constipation	med_opioids	4	52569	1.15019	0.940186	1.40709	1.150 (0.940, 1.407)	1.00595	0.806437	1.25483	1.006 (0.806, 1.255)
visits_gerd	med_opioids	4	52569	1.13817	0.933129	1.38827	1.138 (0.933, 1.388)	1.02815	0.830545	1.27276	1.028 (0.831, 1.273)
visits_nausea	med_opioids	4	52569	1.14807	0.936368	1.40764	1.148 (0.936, 1.408)	0.940156	0.739303	1.19558	0.940 (0.739, 1.196)
visits_vomiting	med_opioids	4	52569	1.25676	1.02018	1.5482	1.257 (1.020, 1.548)	0.961842	0.74974	1.23395	0.962 (0.750, 1.234)
visits_abdominal_pain	medical_chronic_kidney_disease	4	52569	1.07245	0.878581	1.3091	1.072 (0.879, 1.309)	1.25036	0.980095	1.59516	1.250 (0.980, 1.595)
visits_constipation	medical_chronic_kidney_disease	4	52569	1.09527	0.895709	1.33928	1.095 (0.896, 1.339)	1.31357	1.0317	1.67244	1.314 (1.032, 1.672)
visits_gerd	medical_chronic_kidney_disease	4	52569	1.11937	0.917865	1.36512	1.119 (0.918, 1.365)	1.15819	0.922073	1.45477	1.158 (0.922, 1.455)
visits_nausea	medical_chronic_kidney_disease	4	52569	1.11777	0.912284	1.36953	1.118 (0.912, 1.370)	1.1503	0.843662	1.56838	1.150 (0.844, 1.568)
visits_vomiting	medical_chronic_kidney_disease	4	52569	1.18417	0.962168	1.45739	1.184 (0.962, 1.457)	1.23103	0.930784	1.62812	1.231 (0.931, 1.628)
visits_abdominal_pain	medical_obesity	4	52569	1.09636	0.897617	1.3391	1.096 (0.898, 1.339)	1.02111	0.826878	1.26096	1.021 (0.827, 1.261)
visits_constipation	medical_obesity	4	52569	1.15206	0.941345	1.40993	1.152 (0.941, 1.410)	1.01948	0.822074	1.26429	1.019 (0.822, 1.264)
visits_gerd	medical_obesity	4	52569	1.12491	0.922056	1.37238	1.125 (0.922, 1.372)	1.0963	0.890475	1.3497	1.096 (0.890, 1.350)
visits_nausea	medical_obesity	4	52569	1.09804	0.895088	1.34701	1.098 (0.895, 1.347)	1.17489	0.93404	1.47786	1.175 (0.934, 1.478)
visits_vomiting	medical_obesity	4	52569	1.21187	0.982829	1.49428	1.212 (0.983, 1.494)	1.16579	0.91983	1.47752	1.166 (0.920, 1.478)
visits_abdominal_pain	pre_visits_sleep_disorders	4	52569	1.08755	0.889766	1.3293	1.088 (0.890, 1.329)	1.07596	0.876042	1.32149	1.076 (0.876, 1.321)
visits_constipation	pre_visits_sleep_disorders	4	52569	1.11306	0.908709	1.36336	1.113 (0.909, 1.363)	1.13188	0.917698	1.39604	1.132 (0.918, 1.396)
visits_gerd	pre_visits_sleep_disorders	4	52569	1.10877	0.908324	1.35345	1.109 (0.908, 1.353)	1.14625	0.935715	1.40414	1.146 (0.936, 1.404)
visits_nausea	pre_visits_sleep_disorders	4	52569	1.10908	0.90269	1.36266	1.109 (0.903, 1.363)	1.12195	0.903617	1.39303	1.122 (0.904, 1.393)
visits_vomiting	pre_visits_sleep_disorders	4	52569	1.23583	1.00068	1.52623	1.236 (1.001, 1.526)	1.1345	0.903997	1.42378	1.134 (0.904, 1.424)

## Sheet: glp1 vs dpp4
outcome	modifier	n_sites	total_patients	HR_beta1	HR_beta1_CI_lower	HR_beta1_CI_upper	HR_beta1_CI	HR_beta1_beta3	HR_beta1_beta3_CI_lower	HR_beta1_beta3_CI_upper	HR_beta1_beta3_CI
visits_abdominal_pain	ethnicity_binary	4	51445	1.06268	0.856376	1.31869	1.063 (0.856, 1.319)	1.01482	0.831373	1.23875	1.015 (0.831, 1.239)
visits_constipation	ethnicity_binary	4	51445	1.07185	0.853938	1.34538	1.072 (0.854, 1.345)	1.04084	0.851671	1.27204	1.041 (0.852, 1.272)
visits_gerd	ethnicity_binary	4	51445	0.942533	0.760681	1.16786	0.943 (0.761, 1.168)	1.04435	0.856581	1.27328	1.044 (0.857, 1.273)
visits_nausea	ethnicity_binary	4	51445	0.985372	0.774138	1.25424	0.985 (0.774, 1.254)	1.12237	0.915765	1.37558	1.122 (0.916, 1.376)
visits_vomiting	ethnicity_binary	4	51445	0.902879	0.69149	1.17889	0.903 (0.691, 1.179)	1.09928	0.894297	1.35124	1.099 (0.894, 1.351)
visits_abdominal_pain	gender_binary	4	51445	1.05184	0.762343	1.45128	1.052 (0.762, 1.451)	1.09467	0.703602	1.7031	1.095 (0.704, 1.703)
visits_constipation	gender_binary	4	51445	1.1097	0.803019	1.5335	1.110 (0.803, 1.533)	1.06682	0.68513	1.66115	1.067 (0.685, 1.661)
visits_gerd	gender_binary	4	51445	1.0796	0.783022	1.48852	1.080 (0.783, 1.489)	1.08237	0.696594	1.68179	1.082 (0.697, 1.682)
visits_nausea	gender_binary	4	51445	1.10767	0.800275	1.53314	1.108 (0.800, 1.533)	1.23894	0.792346	1.93724	1.239 (0.792, 1.937)
visits_vomiting	gender_binary	4	51445	1.06962	0.769452	1.4869	1.070 (0.769, 1.487)	1.20158	0.767677	1.88073	1.202 (0.768, 1.881)
visits_abdominal_pain	lab_bmi_binary	4	51445	1.17157	0.69049	1.98782	1.172 (0.690, 1.988)	1.01984	0.72346	1.43763	1.020 (0.723, 1.438)
visits_constipation	lab_bmi_binary	4	51445	1.21777	0.717104	2.06801	1.218 (0.717, 2.068)	1.04329	0.739324	1.47223	1.043 (0.739, 1.472)
visits_gerd	lab_bmi_binary	4	51445	1.17239	0.692097	1.98599	1.172 (0.692, 1.986)	1.04188	0.739613	1.46768	1.042 (0.740, 1.468)
visits_nausea	lab_bmi_binary	4	51445	1.35742	0.795555	2.3161	1.357 (0.796, 2.316)	1.07565	0.760976	1.52044	1.076 (0.761, 1.520)
visits_vomiting	lab_bmi_binary	4	51445	1.09646	0.641536	1.87399	1.096 (0.642, 1.874)	1.13694	0.802188	1.61138	1.137 (0.802, 1.611)
visits_abdominal_pain	lab_hba1c_binary	4	51445	0.981633	0.803038	1.19995	0.982 (0.803, 1.200)	1.0873	0.887232	1.33248	1.087 (0.887, 1.332)
visits_constipation	lab_hba1c_binary	4	51445	0.999282	0.816205	1.22342	0.999 (0.816, 1.223)	1.12879	0.917899	1.38814	1.129 (0.918, 1.388)
visits_gerd	lab_hba1c_binary	4	51445	1.00817	0.826272	1.23011	1.008 (0.826, 1.230)	1.08489	0.886586	1.32754	1.085 (0.887, 1.328)
visits_nausea	lab_hba1c_binary	4	51445	1.02937	0.837525	1.26517	1.029 (0.838, 1.265)	1.23849	1.00086	1.53253	1.238 (1.001, 1.533)
visits_vomiting	lab_hba1c_binary	4	51445	1.04526	0.84541	1.29234	1.045 (0.845, 1.292)	1.10599	0.890984	1.37287	1.106 (0.891, 1.373)
visits_abdominal_pain	med_lipid	4	51445	1.07984	0.704492	1.65517	1.080 (0.704, 1.655)	1.05939	0.762554	1.47178	1.059 (0.763, 1.472)
visits_constipation	med_lipid	4	51445	1.0864	0.707824	1.66745	1.086 (0.708, 1.667)	1.10105	0.792067	1.53057	1.101 (0.792, 1.531)
visits_gerd	med_lipid	4	51445	1.11008	0.724651	1.7005	1.110 (0.725, 1.700)	1.04299	0.752078	1.44642	1.043 (0.752, 1.446)
visits_nausea	med_lipid	4	51445	1.13292	0.737192	1.74106	1.133 (0.737, 1.741)	1.19296	0.853634	1.66716	1.193 (0.854, 1.667)
visits_vomiting	med_lipid	4	51445	1.02809	0.667268	1.58403	1.028 (0.667, 1.584)	1.28505	0.916878	1.80106	1.285 (0.917, 1.801)
visits_abdominal_pain	med_metformin	4	51445	1.07085	0.748426	1.53216	1.071 (0.748, 1.532)	1.07088	0.673358	1.70309	1.071 (0.673, 1.703)
visits_constipation	med_metformin	4	51445	1.06818	0.745731	1.53005	1.068 (0.746, 1.530)	1.13107	0.710451	1.80072	1.131 (0.710, 1.801)
visits_gerd	med_metformin	4	51445	1.09063	0.762903	1.55915	1.091 (0.763, 1.559)	1.06942	0.673152	1.69897	1.069 (0.673, 1.699)
visits_nausea	med_metformin	4	51445	1.11064	0.773735	1.59425	1.111 (0.774, 1.594)	1.21899	0.763517	1.94617	1.219 (0.764, 1.946)
visits_vomiting	med_metformin	4	51445	1.08155	0.751659	1.55623	1.082 (0.752, 1.556)	1.2059	0.752916	1.93142	1.206 (0.753, 1.931)
visits_abdominal_pain	med_opioids	4	51445	1.04039	0.701016	1.54405	1.040 (0.701, 1.544)	1.21854	0.72719	2.0419	1.219 (0.727, 2.042)
visits_constipation	med_opioids	4	51445	1.08001	0.727117	1.60417	1.080 (0.727, 1.604)	1.15942	0.691242	1.9447	1.159 (0.691, 1.945)
visits_gerd	med_opioids	4	51445	1.07194	0.7227	1.58994	1.072 (0.723, 1.590)	1.11912	0.668983	1.87214	1.119 (0.669, 1.872)
visits_nausea	med_opioids	4	51445	1.13589	0.763668	1.68953	1.136 (0.764, 1.690)	1.23655	0.732404	2.08771	1.237 (0.732, 2.088)
visits_vomiting	med_opioids	4	51445	1.1352	0.761804	1.69161	1.135 (0.762, 1.692)	1.10419	0.651552	1.87127	1.104 (0.652, 1.871)
visits_abdominal_pain	medical_chronic_kidney_disease	4	51445	1.01729	0.833546	1.24155	1.017 (0.834, 1.242)	1.08142	0.861099	1.35811	1.081 (0.861, 1.358)
visits_constipation	medical_chronic_kidney_disease	4	51445	1.04369	0.853893	1.27568	1.044 (0.854, 1.276)	1.03851	0.831104	1.29767	1.039 (0.831, 1.298)
visits_gerd	medical_chronic_kidney_disease	4	51445	1.02284	0.838944	1.24705	1.023 (0.839, 1.247)	1.14785	0.925424	1.42373	1.148 (0.925, 1.424)
visits_nausea	medical_chronic_kidney_disease	4	51445	1.0932	0.892382	1.3392	1.093 (0.892, 1.339)	1.22914	0.934545	1.61659	1.229 (0.935, 1.617)
visits_vomiting	medical_chronic_kidney_disease	4	51445	1.04489	0.849809	1.28476	1.045 (0.850, 1.285)	1.27709	0.989764	1.64783	1.277 (0.990, 1.648)
visits_abdominal_pain	medical_obesity	4	51445	1.04223	0.853348	1.27291	1.042 (0.853, 1.273)	0.953846	0.775517	1.17318	0.954 (0.776, 1.173)
visits_constipation	medical_obesity	4	51445	1.02658	0.839266	1.25569	1.027 (0.839, 1.256)	1.09726	0.888555	1.35499	1.097 (0.889, 1.355)
visits_gerd	medical_obesity	4	51445	1.03281	0.846751	1.25975	1.033 (0.847, 1.260)	1.03373	0.843162	1.26737	1.034 (0.843, 1.267)
visits_nausea	medical_obesity	4	51445	1.14519	0.93325	1.40525	1.145 (0.933, 1.405)	0.972774	0.78034	1.21266	0.973 (0.780, 1.213)
visits_vomiting	medical_obesity	4	51445	1.05303	0.855084	1.29681	1.053 (0.855, 1.297)	1.1549	0.917391	1.4539	1.155 (0.917, 1.454)
visits_abdominal_pain	pre_visits_sleep_disorders	4	51445	1.00575	0.823445	1.22842	1.006 (0.823, 1.228)	1.06682	0.867647	1.3117	1.067 (0.868, 1.312)
visits_constipation	pre_visits_sleep_disorders	4	51445	1.0332	0.844641	1.26386	1.033 (0.845, 1.264)	1.07936	0.874316	1.3325	1.079 (0.874, 1.332)
visits_gerd	pre_visits_sleep_disorders	4	51445	1.02629	0.841325	1.25193	1.026 (0.841, 1.252)	1.05658	0.86235	1.29456	1.057 (0.862, 1.295)
visits_nausea	pre_visits_sleep_disorders	4	51445	1.11585	0.909084	1.36964	1.116 (0.909, 1.370)	1.06937	0.859789	1.33004	1.069 (0.860, 1.330)
visits_vomiting	pre_visits_sleep_disorders	4	51445	1.09427	0.888405	1.34785	1.094 (0.888, 1.348)	1.03177	0.82097	1.29669	1.032 (0.821, 1.297)
