# Supplementary material for: Federated target trial emulation for time-to-event outcomes via POLARIS: Pooled-equivalent One-shot Likelihood Aggregation for Real-world Inference in Survival
Source: Research Square preprint supplement (doi:10.21203/rs.3.rs-9613167/v1), 2026-05-20
Supplement: Supplementary file 2 [file 456faadb41940fe969ccfcef.xlsx]

## Sheet: GLP1 vs dpp4
				Abdominal Pain			Constipation			GERD			Nausea			Vomiting
	Modifier	Definition	Treatment	N	Events	Event_pct	N	Events	Event_pct	N	Events	Event_pct	N	Events	Event_pct	N	Events	Event_pct
UPHS	Age	Age <65 years	DPP4	2940	350	11.9	2940	225	7.65	2940	568	19.32	2940	120	4.08	2940	74	2.52
	Age	Age <65 years	GLP1	5590	616	11.02	5590	423	7.57	5590	1067	19.09	5590	257	4.6	5590	153	2.74
	Age	Age >= 65 years	DPP4	3801	318	8.37	3801	339	8.92	3801	747	19.65	3801	105	2.76	3801	111	2.92
	Age	Age >= 65 years	GLP1	2412	227	9.41	2412	229	9.49	2412	556	23.05	2412	82	3.4	2412	58	2.4
	gender_binary	Female	DPP4	3155	393	12.46	3155	277	8.78	3155	634	20.1	3155	145	4.6	3155	102	3.23
	gender_binary	Female	GLP1	4357	558	12.81	4357	415	9.52	4357	952	21.85	4357	242	5.55	4357	132	3.03
	gender_binary	Male	DPP4	3586	275	7.67	3586	287	8	3586	681	18.99	3586	80	2.23	3586	83	2.31
	gender_binary	Male	GLP1	3645	285	7.82	3645	237	6.5	3645	671	18.41	3645	97	2.66	3645	79	2.17
	ethnicity_binary	Non-Hispanic	DPP4	395	58	14.68	395	22	5.57	395	71	17.97	395	12	3.04	395	8	2.03
	ethnicity_binary	Non-Hispanic	GLP1	396	52	13.13	396	38	9.6	396	75	18.94	396	18	4.55	396	16	4.04
	ethnicity_binary	Hispanic	DPP4	6346	610	9.61	6346	542	8.54	6346	1244	19.6	6346	213	3.36	6346	177	2.79
	ethnicity_binary	Hispanic	GLP1	7606	791	10.4	7606	614	8.07	7606	1548	20.35	7606	321	4.22	7606	195	2.56
	medical_chronic_kidney_disease	No	DPP4	5618	563	10.02	5618	435	7.74	5618	1087	19.35	5618	193	3.44	5618	142	2.53
	medical_chronic_kidney_disease	No	GLP1	7239	746	10.31	7239	561	7.75	7239	1440	19.89	7239	300	4.14	7239	176	2.43
	medical_chronic_kidney_disease	Yes	DPP4	1123	105	9.35	1123	129	11.49	1123	228	20.3	1123	32	2.85	1123	43	3.83
	medical_chronic_kidney_disease	Yes	GLP1	763	97	12.71	763	91	11.93	763	183	23.98	763	39	5.11	763	35	4.59
	medical_coronary_atherosclerosis_and_other_heart_disease	No	DPP4	5397	541	10.02	5397	421	7.8	5397	1041	19.29	5397	180	3.34	5397	136	2.52
	medical_coronary_atherosclerosis_and_other_heart_disease	No	GLP1	6924	730	10.54	6924	566	8.17	6924	1394	20.13	6924	297	4.29	6924	181	2.61
	medical_coronary_atherosclerosis_and_other_heart_disease	Yes	DPP4	1344	127	9.45	1344	143	10.64	1344	274	20.39	1344	45	3.35	1344	49	3.65
	medical_coronary_atherosclerosis_and_other_heart_disease	Yes	GLP1	1078	113	10.48	1078	86	7.98	1078	229	21.24	1078	42	3.9	1078	30	2.78
	medical_cerebrovascular_disease	No	DPP4	6186	614	9.93	6186	505	8.16	6186	1215	19.64	6186	206	3.33	6186	158	2.55
	medical_cerebrovascular_disease	No	GLP1	7653	801	10.47	7653	614	8.02	7653	1554	20.31	7653	318	4.16	7653	191	2.5
	medical_cerebrovascular_disease	Yes	DPP4	555	54	9.73	555	59	10.63	555	100	18.02	555	19	3.42	555	27	4.86
	medical_cerebrovascular_disease	Yes	GLP1	349	42	12.03	349	38	10.89	349	69	19.77	349	21	6.02	349	20	5.73
	medical_hypertension	No	DPP4	1757	166	9.45	1757	129	7.34	1757	326	18.55	1757	57	3.24	1757	36	2.05
	medical_hypertension	No	GLP1	2458	248	10.09	2458	162	6.59	2458	457	18.59	2458	102	4.15	2458	60	2.44
	medical_hypertension	Yes	DPP4	4984	502	10.07	4984	435	8.73	4984	989	19.84	4984	168	3.37	4984	149	2.99
	medical_hypertension	Yes	GLP1	5544	595	10.73	5544	490	8.84	5544	1166	21.03	5544	237	4.27	5544	151	2.72
	medical_obesity	No	DPP4	5287	501	9.48	5287	437	8.27	5287	1024	19.37	5287	162	3.06	5287	146	2.76
	medical_obesity	No	GLP1	4189	412	9.84	4189	337	8.04	4189	863	20.6	4189	185	4.42	4189	108	2.58
	medical_obesity	Yes	DPP4	1454	167	11.49	1454	127	8.73	1454	291	20.01	1454	63	4.33	1454	39	2.68
	medical_obesity	Yes	GLP1	3813	431	11.3	3813	315	8.26	3813	760	19.93	3813	154	4.04	3813	103	2.7
	med_insulin	No	DPP4	4597	433	9.42	4597	324	7.05	4597	939	20.43	4597	150	3.26	4597	82	1.78
	med_insulin	No	GLP1	5692	520	9.14	5692	394	6.92	5692	1132	19.89	5692	215	3.78	5692	121	2.13
	med_insulin	Yes	DPP4	2144	235	10.96	2144	240	11.19	2144	376	17.54	2144	75	3.5	2144	103	4.8
	med_insulin	Yes	GLP1	2310	323	13.98	2310	258	11.17	2310	491	21.26	2310	124	5.37	2310	90	3.9
	med_metformin	No	DPP4	2447	233	9.52	2447	235	9.6	2447	482	19.7	2447	77	3.15	2447	78	3.19
	med_metformin	No	GLP1	3200	302	9.44	3200	250	7.81	3200	647	20.22	3200	121	3.78	3200	85	2.66
	med_metformin	Yes	DPP4	4294	435	10.13	4294	329	7.66	4294	833	19.4	4294	148	3.45	4294	107	2.49
	med_metformin	Yes	GLP1	4802	541	11.27	4802	402	8.37	4802	976	20.32	4802	218	4.54	4802	126	2.62
	med_opioids	No	DPP4	5052	451	8.93	5052	369	7.3	5052	970	19.2	5052	157	3.11	5052	132	2.61
	med_opioids	No	GLP1	6371	590	9.26	6371	459	7.2	6371	1225	19.23	6371	232	3.64	6371	145	2.28
	med_opioids	Yes	DPP4	1689	217	12.85	1689	195	11.55	1689	345	20.43	1689	68	4.03	1689	53	3.14
	med_opioids	Yes	GLP1	1631	253	15.51	1631	193	11.83	1631	398	24.4	1631	107	6.56	1631	66	4.05
	med_proton_pump_inhibitors	No	DPP4	5501	518	9.42	5501	434	7.89	5501	884	16.07	5501	164	2.98	5501	147	2.67
	med_proton_pump_inhibitors	No	GLP1	6769	650	9.6	6769	503	7.43	6769	1086	16.04	6769	259	3.83	6769	152	2.25
	med_proton_pump_inhibitors	Yes	DPP4	1240	150	12.1	1240	130	10.48	1240	431	34.76	1240	61	4.92	1240	38	3.06
	med_proton_pump_inhibitors	Yes	GLP1	1233	193	15.65	1233	149	12.08	1233	537	43.55	1233	80	6.49	1233	59	4.79
	med_lipid	No	DPP4	2028	228	11.24	2028	163	8.04	2028	404	19.92	2028	65	3.21	2028	57	2.81
	med_lipid	No	GLP1	2961	313	10.57	2961	187	6.32	2961	546	18.44	2961	125	4.22	2961	72	2.43
	med_lipid	Yes	DPP4	4713	440	9.34	4713	401	8.51	4713	911	19.33	4713	160	3.39	4713	128	2.72
	med_lipid	Yes	GLP1	5041	530	10.51	5041	465	9.22	5041	1077	21.36	5041	214	4.25	5041	139	2.76
	med_nsaids	No	DPP4	5349	474	8.86	5349	415	7.76	5349	995	18.6	5349	153	2.86	5349	147	2.75
	med_nsaids	No	GLP1	5962	537	9.01	5962	423	7.09	5962	1117	18.74	5962	218	3.66	5962	131	2.2
	med_nsaids	Yes	DPP4	1392	194	13.94	1392	149	10.7	1392	320	22.99	1392	72	5.17	1392	38	2.73
	med_nsaids	Yes	GLP1	2040	306	15	2040	229	11.23	2040	506	24.8	2040	121	5.93	2040	80	3.92
	lab_hba1c_binary	<8.5%	DPP4	4506	428	9.5	4506	373	8.28	4506	894	19.84	4506	146	3.24	4506	105	2.33
	lab_hba1c_binary	<8.5%	GLP1	5320	478	8.98	5320	405	7.61	5320	1084	20.38	5320	197	3.7	5320	108	2.03
	lab_hba1c_binary	>= 8.5%	DPP4	2235	240	10.74	2235	191	8.55	2235	421	18.84	2235	79	3.53	2235	80	3.58
	lab_hba1c_binary	>= 8.5%	GLP1	2682	365	13.61	2682	247	9.21	2682	539	20.1	2682	142	5.29	2682	103	3.84
	lab_bmi_binary	<30 kg/m2	DPP4	3084	287	9.31	3084	255	8.27	3084	578	18.74	3084	90	2.92	3084	106	3.44
	lab_bmi_binary	<30 kg/m2	GLP1	1541	154	9.99	1541	133	8.63	1541	319	20.7	1541	76	4.93	1541	44	2.86
	lab_bmi_binary	<30 kg/m2	DPP4	3657	381	10.42	3657	309	8.45	3657	737	20.15	3657	135	3.69	3657	79	2.16
	lab_bmi_binary	<30 kg/m2	GLP1	6461	689	10.66	6461	519	8.03	6461	1304	20.18	6461	263	4.07	6461	167	2.58
	pre_visits_sleep_disorders	No	DPP4	5806	554	9.54	5806	474	8.16	5806	1101	18.96	5806	179	3.08	5806	158	2.72
	pre_visits_sleep_disorders	No	GLP1	6153	611	9.93	6153	462	7.51	6153	1181	19.19	6153	235	3.82	6153	151	2.45
	pre_visits_sleep_disorders	Yes	DPP4	935	114	12.19	935	90	9.63	935	214	22.89	935	46	4.92	935	27	2.89
	pre_visits_sleep_disorders	Yes	GLP1	1849	232	12.55	1849	190	10.28	1849	442	23.9	1849	104	5.62	1849	60	3.24
	any_aht_medications	No	DPP4	1643	166	10.1	1643	109	6.63	1643	312	18.99	1643	56	3.41	1643	42	2.56
	any_aht_medications	No	GLP1	2515	251	9.98	2515	161	6.4	2515	453	18.01	2515	93	3.7	2515	57	2.27
	any_aht_medications	Yes	DPP4	5098	502	9.85	5098	455	8.93	5098	1003	19.67	5098	169	3.32	5098	143	2.81
	any_aht_medications	Yes	GLP1	5487	592	10.79	5487	491	8.95	5487	1170	21.32	5487	246	4.48	5487	154	2.81
YNHHS	Age <65 years	Age <65 years	DPP4	3238	664	20.51	3238	424	13.09	3238	796	24.58	3238	325	10.04	3238	201	6.21
	Age <65 years	Age <65 years	GLP1	6464	1124	17.39	6464	658	10.18	6464	1333	20.62	6464	560	8.66	6464	318	4.92
	Age >= 65 years	Age >= 65 years	DPP4	3312	647	19.54	3312	739	22.31	3312	1013	30.59	3312	277	8.36	3312	325	9.81
	Age >= 65 years	Age >= 65 years	GLP1	2724	400	14.68	2724	419	15.38	2724	737	27.06	2724	173	6.35	2724	169	6.2
	gender_binary	Female	DPP4	3015	682	22.62	3015	585	19.4	3015	835	27.69	3015	378	12.54	3015	259	8.59
	gender_binary	Female	GLP1	5175	963	18.61	5175	646	12.48	5175	1188	22.96	5175	518	10.01	5175	290	5.6
	gender_binary	Male	DPP4	3535	629	17.79	3535	578	16.35	3535	974	27.55	3535	224	6.34	3535	267	7.55
	gender_binary	Male	GLP1	4013	561	13.98	4013	431	10.74	4013	882	21.98	4013	215	5.36	4013	197	4.91
	ethnicity_binary	Non-Hispanic	DPP4	1397	292	20.9	1397	220	15.75	1397	362	25.91	1397	139	9.95	1397	96	6.87
	ethnicity_binary	Non-Hispanic	GLP1	1737	348	20.03	1737	207	11.92	1737	340	19.57	1737	164	9.44	1737	83	4.78
	ethnicity_binary	Hispanic	DPP4	5153	1019	19.77	5153	943	18.3	5153	1447	28.08	5153	463	8.99	5153	430	8.34
	ethnicity_binary	Hispanic	GLP1	7451	1176	15.78	7451	870	11.68	7451	1730	23.22	7451	569	7.64	7451	404	5.42
	medical_chronic_kidney_disease	No	DPP4	5502	1072	19.48	5502	875	15.9	5502	1466	26.64	5502	512	9.31	5502	393	7.14
	medical_chronic_kidney_disease	No	GLP1	8429	1372	16.28	8429	904	10.72	8429	1829	21.7	8429	671	7.96	8429	416	4.94
	medical_chronic_kidney_disease	Yes	DPP4	1048	239	22.81	1048	288	27.48	1048	343	32.73	1048	90	8.59	1048	133	12.69
	medical_chronic_kidney_disease	Yes	GLP1	759	152	20.03	759	173	22.79	759	241	31.75	759	62	8.17	759	71	9.35
	medical_coronary_atherosclerosis_and_other_heart_disease	No	DPP4	5315	1039	19.55	5315	877	16.5	5315	1423	26.77	5315	495	9.31	5315	392	7.38
	medical_coronary_atherosclerosis_and_other_heart_disease	No	GLP1	7987	1310	16.4	7987	878	10.99	7987	1739	21.77	7987	631	7.9	7987	389	4.87
	medical_coronary_atherosclerosis_and_other_heart_disease	Yes	DPP4	1235	272	22.02	1235	286	23.16	1235	386	31.26	1235	107	8.66	1235	134	10.85
	medical_coronary_atherosclerosis_and_other_heart_disease	Yes	GLP1	1201	214	17.82	1201	199	16.57	1201	331	27.56	1201	102	8.49	1201	98	8.16
	medical_cerebrovascular_disease	No	DPP4	6038	1212	20.07	6038	1039	17.21	6038	1656	27.43	6038	562	9.31	6038	445	7.37
	medical_cerebrovascular_disease	No	GLP1	8785	1451	16.52	8785	1012	11.52	8785	1966	22.38	8785	704	8.01	8785	440	5.01
	medical_cerebrovascular_disease	Yes	DPP4	512	99	19.34	512	124	24.22	512	153	29.88	512	40	7.81	512	81	15.82
	medical_cerebrovascular_disease	Yes	GLP1	403	73	18.11	403	65	16.13	403	104	25.81	403	29	7.2	403	47	11.66
	medical_hypertension	No	DPP4	1522	284	18.66	1522	200	13.14	1522	348	22.86	1522	132	8.67	1522	91	5.98
	medical_hypertension	No	GLP1	2806	446	15.89	2806	260	9.27	2806	542	19.32	2806	222	7.91	2806	135	4.81
	medical_hypertension	Yes	DPP4	5028	1027	20.43	5028	963	19.15	5028	1461	29.06	5028	470	9.35	5028	435	8.65
	medical_hypertension	Yes	GLP1	6382	1078	16.89	6382	817	12.8	6382	1528	23.94	6382	511	8.01	6382	352	5.52
	medical_obesity	No	DPP4	4944	925	18.71	4944	869	17.58	4944	1350	27.31	4944	437	8.84	4944	390	7.89
	medical_obesity	No	GLP1	4358	713	16.36	4358	500	11.47	4358	989	22.69	4358	341	7.82	4358	239	5.48
	medical_obesity	Yes	DPP4	1606	386	24.03	1606	294	18.31	1606	459	28.58	1606	165	10.27	1606	136	8.47
	medical_obesity	Yes	GLP1	4830	811	16.79	4830	577	11.95	4830	1081	22.38	4830	392	8.12	4830	248	5.13
	med_insulin	No	DPP4	4206	814	19.35	4206	669	15.91	4206	1165	27.7	4206	386	9.18	4206	261	6.21
	med_insulin	No	GLP1	6550	985	15.04	6550	655	10	6550	1401	21.39	6550	489	7.47	6550	258	3.94
	med_insulin	Yes	DPP4	2344	497	21.2	2344	494	21.08	2344	644	27.47	2344	216	9.22	2344	265	11.31
	med_insulin	Yes	GLP1	2638	539	20.43	2638	422	16	2638	669	25.36	2638	244	9.25	2638	229	8.68
	med_metformin	No	DPP4	2145	440	20.51	2145	446	20.79	2145	638	29.74	2145	199	9.28	2145	209	9.74
	med_metformin	No	GLP1	4358	736	16.89	4358	552	12.67	4358	1065	24.44	4358	334	7.66	4358	235	5.39
	med_metformin	Yes	DPP4	4405	871	19.77	4405	717	16.28	4405	1171	26.58	4405	403	9.15	4405	317	7.2
	med_metformin	Yes	GLP1	4830	788	16.31	4830	525	10.87	4830	1005	20.81	4830	399	8.26	4830	252	5.22
	med_opioids	No	DPP4	4861	924	19.01	4861	796	16.38	4861	1312	26.99	4861	416	8.56	4861	346	7.12
	med_opioids	No	GLP1	7258	1129	15.56	7258	784	10.8	7258	1593	21.95	7258	557	7.67	7258	358	4.93
	med_opioids	Yes	DPP4	1689	387	22.91	1689	367	21.73	1689	497	29.43	1689	186	11.01	1689	180	10.66
	med_opioids	Yes	GLP1	1930	395	20.47	1930	293	15.18	1930	477	24.72	1930	176	9.12	1930	129	6.68
	med_proton_pump_inhibitors	No	DPP4	5878	1159	19.72	5878	1014	17.25	5878	1487	25.3	5878	531	9.03	5878	459	7.81
	med_proton_pump_inhibitors	No	GLP1	8363	1360	16.26	8363	958	11.46	8363	1719	20.55	8363	639	7.64	8363	435	5.2
	med_proton_pump_inhibitors	Yes	DPP4	672	152	22.62	672	149	22.17	672	322	47.92	672	71	10.57	672	67	9.97
	med_proton_pump_inhibitors	Yes	GLP1	825	164	19.88	825	119	14.42	825	351	42.55	825	94	11.39	825	52	6.3
	med_lipid	No	DPP4	2507	536	21.38	2507	418	16.67	2507	676	26.96	2507	270	10.77	2507	213	8.5
	med_lipid	No	GLP1	4243	784	18.48	4243	457	10.77	4243	985	23.21	4243	361	8.51	4243	215	5.07
	med_lipid	Yes	DPP4	4043	775	19.17	4043	745	18.43	4043	1133	28.02	4043	332	8.21	4043	313	7.74
	med_lipid	Yes	GLP1	4945	740	14.96	4945	620	12.54	4945	1085	21.94	4945	372	7.52	4945	272	5.5
	med_nsaids	No	DPP4	4924	929	18.87	4924	850	17.26	4924	1341	27.23	4924	401	8.14	4924	380	7.72
	med_nsaids	No	GLP1	6649	1010	15.19	6649	735	11.05	6649	1480	22.26	6649	483	7.26	6649	349	5.25
	med_nsaids	Yes	DPP4	1626	382	23.49	1626	313	19.25	1626	468	28.78	1626	201	12.36	1626	146	8.98
	med_nsaids	Yes	GLP1	2539	514	20.24	2539	342	13.47	2539	590	23.24	2539	250	9.85	2539	138	5.44
	lab_hba1c_binary	<8.5%	DPP4	4195	834	19.88	4195	783	18.67	4195	1252	29.85	4195	382	9.11	4195	327	7.79
	lab_hba1c_binary	<8.5%	GLP1	6625	1012	15.28	6625	748	11.29	6625	1465	22.11	6625	494	7.46	6625	300	4.53
	lab_hba1c_binary	>= 8.5%	DPP4	2355	477	20.25	2355	380	16.14	2355	557	23.65	2355	220	9.34	2355	199	8.45
	lab_hba1c_binary	>= 8.5%	GLP1	2563	512	19.98	2563	329	12.84	2563	605	23.61	2563	239	9.33	2563	187	7.3
	lab_bmi_binary	<30 kg/m2	DPP4	2839	490	17.26	2839	506	17.82	2839	720	25.36	2839	227	8	2839	238	8.38
	lab_bmi_binary	<30 kg/m2	GLP1	1417	225	15.88	1417	183	12.91	1417	314	22.16	1417	108	7.62	1417	78	5.5
	lab_bmi_binary	<30 kg/m2	DPP4	3711	821	22.12	3711	657	17.7	3711	1089	29.35	3711	375	10.11	3711	288	7.76
	lab_bmi_binary	<30 kg/m2	GLP1	7771	1299	16.72	7771	894	11.5	7771	1756	22.6	7771	625	8.04	7771	409	5.26
	pre_visits_sleep_disorders	No	DPP4	5589	1082	19.36	5589	946	16.93	5589	1473	26.36	5589	504	9.02	5589	446	7.98
	pre_visits_sleep_disorders	No	GLP1	6695	1073	16.03	6695	763	11.4	6695	1409	21.05	6695	537	8.02	6695	346	5.17
	pre_visits_sleep_disorders	Yes	DPP4	961	229	23.83	961	217	22.58	961	336	34.96	961	98	10.2	961	80	8.32
	pre_visits_sleep_disorders	Yes	GLP1	2493	451	18.09	2493	314	12.6	2493	661	26.51	2493	196	7.86	2493	141	5.66
	any_aht_medications	No	DPP4	1883	389	20.66	1883	262	13.91	1883	508	26.98	1883	174	9.24	1883	104	5.52
	any_aht_medications	No	GLP1	3405	571	16.77	3405	346	10.16	3405	724	21.26	3405	270	7.93	3405	182	5.35
	any_aht_medications	Yes	DPP4	4667	922	19.76	4667	901	19.31	4667	1301	27.88	4667	428	9.17	4667	422	9.04
	any_aht_medications	Yes	GLP1	5783	953	16.48	5783	731	12.64	5783	1346	23.28	5783	463	8.01	5783	305	5.27
Mayo	Age <65 years	Age <65 years	DPP4	1315	244	18.56	1315	129	9.81	1315	310	23.57	1315	110	8.37	1315	63	4.79
	Age <65 years	Age <65 years	GLP1	8542	1254	14.68	8542	591	6.92	8542	1484	17.37	8542	625	7.32	8542	320	3.75
	Age >= 65 years	Age >= 65 years	DPP4	1530	281	18.37	1530	196	12.81	1530	415	27.12	1530	106	6.93	1530	79	5.16
	Age >= 65 years	Age >= 65 years	GLP1	4976	699	14.05	4976	517	10.39	4976	1163	23.37	4976	324	6.51	4976	193	3.88
	gender_binary	Female	DPP4	1147	251	21.88	1147	146	12.73	1147	280	24.41	1147	123	10.72	1147	70	6.1
	gender_binary	Female	GLP1	6557	1063	16.21	6557	581	8.86	6557	1252	19.09	6557	563	8.59	6557	268	4.09
	gender_binary	Male	DPP4	1698	274	16.14	1698	179	10.54	1698	445	26.21	1698	93	5.48	1698	72	4.24
	gender_binary	Male	GLP1	6961	890	12.79	6961	527	7.57	6961	1395	20.04	6961	386	5.55	6961	245	3.52
	ethnicity_binary	Non-Hispanic	DPP4	168	39	23.21	168	21	12.5	168	40	23.81	168	11	6.55	168	9	5.36
	ethnicity_binary	Non-Hispanic	GLP1	742	129	17.39	742	60	8.09	742	135	18.19	742	54	7.28	742	20	2.7
	ethnicity_binary	Hispanic	DPP4	2677	486	18.15	2677	304	11.36	2677	685	25.59	2677	205	7.66	2677	133	4.97
	ethnicity_binary	Hispanic	GLP1	12776	1824	14.28	12776	1048	8.2	12776	2512	19.66	12776	895	7.01	12776	493	3.86
	medical_chronic_kidney_disease	No	DPP4	2845	525	18.45	2845	325	11.42	2845	725	25.48	2845	216	7.59	2845	142	4.99
	medical_chronic_kidney_disease	No	GLP1	13518	1953	14.45	13518	1108	8.2	13518	2647	19.58	13518	949	7.02	13518	513	3.79
	medical_chronic_kidney_disease	Yes	DPP4	< 10	< 10	0	< 10	< 10	0	< 10	< 10	0	< 10	< 10	0	< 10	< 10	0
	medical_chronic_kidney_disease	Yes	GLP1	< 10	< 10	0	< 10	< 10	0	< 10	< 10	0	< 10	< 10	0	< 10	< 10	0
	medical_coronary_atherosclerosis_and_other_heart_disease	No	DPP4	2845	525	18.45	2845	325	11.42	2845	725	25.48	2845	216	7.59	2845	142	4.99
	medical_coronary_atherosclerosis_and_other_heart_disease	No	GLP1	13518	1953	14.45	13518	1108	8.2	13518	2647	19.58	13518	949	7.02	13518	513	3.79
	medical_coronary_atherosclerosis_and_other_heart_disease	Yes	DPP4	< 10	< 10	0	< 10	< 10	0	< 10	< 10	0	< 10	< 10	0	< 10	< 10	0
	medical_coronary_atherosclerosis_and_other_heart_disease	Yes	GLP1	< 10	< 10	0	< 10	< 10	0	< 10	< 10	0	< 10	< 10	0	< 10	< 10	0
	medical_cerebrovascular_disease	No	DPP4	2845	525	18.45	2845	325	11.42	2845	725	25.48	2845	216	7.59	2845	142	4.99
	medical_cerebrovascular_disease	No	GLP1	13518	1953	14.45	13518	1108	8.2	13518	2647	19.58	13518	949	7.02	13518	513	3.79
	medical_cerebrovascular_disease	Yes	DPP4	< 10	< 10	0	< 10	< 10	0	< 10	< 10	0	< 10	< 10	0	< 10	< 10	0
	medical_cerebrovascular_disease	Yes	GLP1	< 10	< 10	0	< 10	< 10	0	< 10	< 10	0	< 10	< 10	0	< 10	< 10	0
	medical_hypertension	No	DPP4	2845	525	18.45	2845	325	11.42	2845	725	25.48	2845	216	7.59	2845	142	4.99
	medical_hypertension	No	GLP1	13518	1953	14.45	13518	1108	8.2	13518	2647	19.58	13518	949	7.02	13518	513	3.79
	medical_hypertension	Yes	DPP4	< 10	< 10	0	< 10	< 10	0	< 10	< 10	0	< 10	< 10	0	< 10	< 10	0
	medical_hypertension	Yes	GLP1	< 10	< 10	0	< 10	< 10	0	< 10	< 10	0	< 10	< 10	0	< 10	< 10	0
	medical_obesity	No	DPP4	2845	525	18.45	2845	325	11.42	2845	725	25.48	2845	216	7.59	2845	142	4.99
	medical_obesity	No	GLP1	13518	1953	14.45	13518	1108	8.2	13518	2647	19.58	13518	949	7.02	13518	513	3.79
	medical_obesity	Yes	DPP4	< 10	< 10	0	< 10	< 10	0	< 10	< 10	0	< 10	< 10	0	< 10	< 10	0
	medical_obesity	Yes	GLP1	< 10	< 10	0	< 10	< 10	0	< 10	< 10	0	< 10	< 10	0	< 10	< 10	0
	med_insulin	No	DPP4	2845	525	18.45	2845	325	11.42	2845	725	25.48	2845	216	7.59	2845	142	4.99
	med_insulin	No	GLP1	13518	1953	14.45	13518	1108	8.2	13518	2647	19.58	13518	949	7.02	13518	513	3.79
	med_insulin	Yes	DPP4	< 10	< 10	0	< 10	< 10	0	< 10	< 10	0	< 10	< 10	0	< 10	< 10	0
	med_insulin	Yes	GLP1	< 10	< 10	0	< 10	< 10	0	< 10	< 10	0	< 10	< 10	0	< 10	< 10	0
	med_metformin	No	DPP4	2845	525	18.45	2845	325	11.42	2845	725	25.48	2845	216	7.59	2845	142	4.99
	med_metformin	No	GLP1	13518	1953	14.45	13518	1108	8.2	13518	2647	19.58	13518	949	7.02	13518	513	3.79
	med_metformin	Yes	DPP4	< 10	< 10	0	< 10	< 10	0	< 10	< 10	0	< 10	< 10	0	< 10	< 10	0
	med_metformin	Yes	GLP1	< 10	< 10	0	< 10	< 10	0	< 10	< 10	0	< 10	< 10	0	< 10	< 10	0
	med_opioids	No	DPP4	2845	525	18.45	2845	325	11.42	2845	725	25.48	2845	216	7.59	2845	142	4.99
	med_opioids	No	GLP1	13518	1953	14.45	13518	1108	8.2	13518	2647	19.58	13518	949	7.02	13518	513	3.79
	med_opioids	Yes	DPP4	< 10	< 10	0	< 10	< 10	0	< 10	< 10	0	< 10	< 10	0	< 10	< 10	0
	med_opioids	Yes	GLP1	< 10	< 10	0	< 10	< 10	0	< 10	< 10	0	< 10	< 10	0	< 10	< 10	0
	med_proton_pump_inhibitors	No	DPP4	2845	525	18.45	2845	325	11.42	2845	725	25.48	2845	216	7.59	2845	142	4.99
	med_proton_pump_inhibitors	No	GLP1	13518	1953	14.45	13518	1108	8.2	13518	2647	19.58	13518	949	7.02	13518	513	3.79
	med_proton_pump_inhibitors	Yes	DPP4	< 10	< 10	0	< 10	< 10	0	< 10	< 10	0	< 10	< 10	0	< 10	< 10	0
	med_proton_pump_inhibitors	Yes	GLP1	< 10	< 10	0	< 10	< 10	0	< 10	< 10	0	< 10	< 10	0	< 10	< 10	0
	med_lipid	No	DPP4	2845	525	18.45	2845	325	11.42	2845	725	25.48	2845	216	7.59	2845	142	4.99
	med_lipid	No	GLP1	13518	1953	14.45	13518	1108	8.2	13518	2647	19.58	13518	949	7.02	13518	513	3.79
	med_lipid	Yes	DPP4	< 10	< 10	0	< 10	< 10	0	< 10	< 10	0	< 10	< 10	0	< 10	< 10	0
	med_lipid	Yes	GLP1	< 10	< 10	0	< 10	< 10	0	< 10	< 10	0	< 10	< 10	0	< 10	< 10	0
	med_nsaids	No	DPP4	2845	525	18.45	2845	325	11.42	2845	725	25.48	2845	216	7.59	2845	142	4.99
	med_nsaids	No	GLP1	13518	1953	14.45	13518	1108	8.2	13518	2647	19.58	13518	949	7.02	13518	513	3.79
	med_nsaids	Yes	DPP4	< 10	< 10	0	< 10	< 10	0	< 10	< 10	0	< 10	< 10	0	< 10	< 10	0
	med_nsaids	Yes	GLP1	< 10	< 10	0	< 10	< 10	0	< 10	< 10	0	< 10	< 10	0	< 10	< 10	0
	lab_hba1c_binary	<8.5%	DPP4	1858	318	17.12	1858	204	10.98	1858	476	25.62	1858	154	8.29	1858	79	4.25
	lab_hba1c_binary	<8.5%	GLP1	9121	1185	12.99	9121	706	7.74	9121	1767	19.37	9121	575	6.3	9121	287	3.15
	lab_hba1c_binary	>= 8.5%	DPP4	987	207	20.97	987	121	12.26	987	249	25.23	987	62	6.28	987	63	6.38
	lab_hba1c_binary	>= 8.5%	GLP1	4397	768	17.47	4397	402	9.14	4397	880	20.01	4397	374	8.51	4397	226	5.14
	lab_bmi_binary	<30 kg/m2	DPP4	950	162	17.05	950	106	11.16	950	227	23.89	950	67	7.05	950	52	5.47
	lab_bmi_binary	<30 kg/m2	GLP1	2155	334	15.5	2155	224	10.39	2155	440	20.42	2155	162	7.52	2155	105	4.87
	lab_bmi_binary	<30 kg/m2	DPP4	1895	363	19.16	1895	219	11.56	1895	498	26.28	1895	149	7.86	1895	90	4.75
	lab_bmi_binary	<30 kg/m2	GLP1	11363	1619	14.25	11363	884	7.78	11363	2207	19.42	11363	787	6.93	11363	408	3.59
	pre_visits_sleep_disorders	No	DPP4	2157	375	17.39	2157	230	10.66	2157	522	24.2	2157	148	6.86	2157	95	4.4
	pre_visits_sleep_disorders	No	GLP1	8949	1207	13.49	8949	673	7.52	8949	1627	18.18	8949	584	6.53	8949	339	3.79
	pre_visits_sleep_disorders	Yes	DPP4	688	150	21.8	688	95	13.81	688	203	29.51	688	68	9.88	688	47	6.83
	pre_visits_sleep_disorders	Yes	GLP1	4569	746	16.33	4569	435	9.52	4569	1020	22.32	4569	365	7.99	4569	174	3.81
	any_aht_medications	No	DPP4	2845	525	18.45	2845	325	11.42	2845	725	25.48	2845	216	7.59	2845	142	4.99
	any_aht_medications	No	GLP1	13518	1953	14.45	13518	1108	8.2	13518	2647	19.58	13518	949	7.02	13518	513	3.79
	any_aht_medications	Yes	DPP4	< 10	< 10	0	< 10	< 10	0	< 10	< 10	0	< 10	< 10	0	< 10	< 10	0
	any_aht_medications	Yes	GLP1	< 10	< 10	0	< 10	< 10	0	< 10	< 10	0	< 10	< 10	0	< 10	< 10	0
UFlorida+	Age <65 years	Age <65 years	DPP4	1983	240	12.1	4208	323	7.68	4208	585	13.9	4208	140	3.33	4208	63	1.5
	Age <65 years	Age <65 years	GLP1	3632	376	10.35	3632	290	7.98	3632	649	17.87	3632	174	4.79	3632	50	1.38
	Age >= 65 years	Age >= 65 years	DPP4	1485	153	10.3	2376	183	7.7	2376	377	15.87	2376	54	2.27	2376	40	1.68
	Age >= 65 years	Age >= 65 years	GLP1	1019	76	7.46	1019	97	9.52	1019	227	22.28	1019	28	2.75	1019	12	1.18
	gender_binary	Female	DPP4	1689	231	13.68	2691	252	9.36	2691	402	14.94	2691	112	4.16	2691	40	1.49
	gender_binary	Female	GLP1	2667	323	12.11	2667	261	9.79	2667	551	20.66	2667	156	5.85	2667	44	1.65
	gender_binary	Male	DPP4	1779	162	9.11	3893	254	6.52	3893	560	14.38	3893	82	2.11	3893	63	1.62
	gender_binary	Male	GLP1	1984	129	6.5	1984	126	6.35	1984	325	16.38	1984	46	2.32	1984	18	0.91
	ethnicity_binary	Non-Hispanic	DPP4	1030	139	13.5	2447	186	7.6	2447	327	13.36	2447	70	2.86	2447	31	1.27
	ethnicity_binary	Non-Hispanic	GLP1	1607	164	10.21	1607	134	8.34	1607	305	18.98	1607	60	3.73	1607	19	1.18
	ethnicity_binary	Hispanic	DPP4	2438	254	10.42	4137	320	7.74	4137	635	15.35	4137	124	3	4137	72	1.74
	ethnicity_binary	Hispanic	GLP1	3044	288	9.46	3044	253	8.31	3044	571	18.76	3044	142	4.66	3044	43	1.41
	medical_chronic_kidney_disease	No	DPP4	2906	321	11.05	5464	404	7.39	5464	772	14.13	5464	164	3	5464	82	1.5
	medical_chronic_kidney_disease	No	GLP1	4225	406	9.61	4225	334	7.91	4225	768	18.18	4225	189	4.47	4225	53	1.25
	medical_chronic_kidney_disease	Yes	DPP4	562	72	12.81	1120	102	9.11	1120	190	16.96	1120	30	2.68	1120	21	1.88
	medical_chronic_kidney_disease	Yes	GLP1	426	46	10.8	426	53	12.44	426	108	25.35	426	13	3.05	426	9	2.11
	medical_coronary_atherosclerosis_and_other_heart_disease	No	DPP4	2839	315	11.1	4673	342	7.32	4673	650	13.91	4673	146	3.12	4673	61	1.31
	medical_coronary_atherosclerosis_and_other_heart_disease	No	GLP1	4090	383	9.36	4090	319	7.8	4090	741	18.12	4090	180	4.4	4090	52	1.27
	medical_coronary_atherosclerosis_and_other_heart_disease	Yes	DPP4	629	78	12.4	1911	164	8.58	1911	312	16.33	1911	48	2.51	1911	42	2.2
	medical_coronary_atherosclerosis_and_other_heart_disease	Yes	GLP1	561	69	12.3	561	68	12.12	561	135	24.06	561	22	3.92	561	10	1.78
	medical_cerebrovascular_disease	No	DPP4	3228	364	11.28	6166	461	7.48	6166	891	14.45	6166	181	2.94	6166	87	1.41
	medical_cerebrovascular_disease	No	GLP1	4478	428	9.56	4478	364	8.13	4478	834	18.62	4478	190	4.24	4478	57	1.27
	medical_cerebrovascular_disease	Yes	DPP4	240	29	12.08	418	45	10.77	418	71	16.99	418	13	3.11	418	16	3.83
	medical_cerebrovascular_disease	Yes	GLP1	173	24	13.87	173	23	13.29	173	42	24.28	173	12	6.94	173	5	2.89
	medical_hypertension	No	DPP4	838	82	9.79	1577	97	6.15	1577	184	11.67	1577	40	2.54	1577	12	0.76
	medical_hypertension	No	GLP1	1496	132	8.82	1496	88	5.88	1496	227	15.17	1496	48	3.21	1496	11	0.74
	medical_hypertension	Yes	DPP4	2630	311	11.83	5007	409	8.17	5007	778	15.54	5007	154	3.08	5007	91	1.82
	medical_hypertension	Yes	GLP1	3155	320	10.14	3155	299	9.48	3155	649	20.57	3155	154	4.88	3155	51	1.62
	medical_obesity	No	DPP4	2254	215	9.54	3853	278	7.22	3853	548	14.22	3853	95	2.47	3853	55	1.43
	medical_obesity	No	GLP1	1838	175	9.52	1838	147	8	1838	327	17.79	1838	69	3.75	1838	22	1.2
	medical_obesity	Yes	DPP4	1214	178	14.66	2731	228	8.35	2731	414	15.16	2731	99	3.63	2731	48	1.76
	medical_obesity	Yes	GLP1	2813	277	9.85	2813	240	8.53	2813	549	19.52	2813	133	4.73	2813	40	1.42
	med_insulin	No	DPP4	2522	275	10.9	4685	293	6.25	4685	657	14.02	4685	115	2.45	4685	59	1.26
	med_insulin	No	GLP1	3249	276	8.49	3249	221	6.8	3249	575	17.7	3249	122	3.76	3249	36	1.11
	med_insulin	Yes	DPP4	946	118	12.47	1899	213	11.22	1899	305	16.06	1899	79	4.16	1899	44	2.32
	med_insulin	Yes	GLP1	1402	176	12.55	1402	166	11.84	1402	301	21.47	1402	80	5.71	1402	26	1.85
	med_metformin	No	DPP4	1302	164	12.6	2973	231	7.77	2973	447	15.04	2973	85	2.86	2973	62	2.09
	med_metformin	No	GLP1	2029	202	9.96	2029	177	8.72	2029	416	20.5	2029	89	4.39	2029	28	1.38
	med_metformin	Yes	DPP4	2166	229	10.57	3611	275	7.62	3611	515	14.26	3611	109	3.02	3611	41	1.14
	med_metformin	Yes	GLP1	2622	250	9.53	2622	210	8.01	2622	460	17.54	2622	113	4.31	2622	34	1.3
	med_opioids	No	DPP4	2728	291	10.67	5231	354	6.77	5231	742	14.18	5231	139	2.66	5231	69	1.32
	med_opioids	No	GLP1	3840	350	9.11	3840	281	7.32	3840	693	18.05	3840	150	3.91	3840	52	1.35
	med_opioids	Yes	DPP4	740	102	13.78	1353	152	11.23	1353	220	16.26	1353	55	4.07	1353	34	2.51
	med_opioids	Yes	GLP1	811	102	12.58	811	106	13.07	811	183	22.56	811	52	6.41	811	10	1.23
	med_proton_pump_inhibitors	No	DPP4	2996	322	10.75	5718	427	7.47	5718	735	12.85	5718	164	2.87	5718	74	1.29
	med_proton_pump_inhibitors	No	GLP1	4204	387	9.21	4204	336	7.99	4204	720	17.13	4204	176	4.19	4204	55	1.31
	med_proton_pump_inhibitors	Yes	DPP4	472	71	15.04	866	79	9.12	866	227	26.21	866	30	3.46	866	29	3.35
	med_proton_pump_inhibitors	Yes	GLP1	447	65	14.54	447	51	11.41	447	156	34.9	447	26	5.82	447	< 10	0
	med_lipid	No	DPP4	1420	153	10.77	2286	177	7.74	2286	358	15.66	2286	84	3.67	2286	39	1.71
	med_lipid	No	GLP1	2206	217	9.84	2206	171	7.75	2206	396	17.95	2206	107	4.85	2206	34	1.54
	med_lipid	Yes	DPP4	2048	240	11.72	4298	329	7.65	4298	604	14.05	4298	110	2.56	4298	64	1.49
	med_lipid	Yes	GLP1	2445	235	9.61	2445	216	8.83	2445	480	19.63	2445	95	3.89	2445	28	1.15
	med_nsaids	No	DPP4	2785	292	10.48	5366	389	7.25	5366	751	14	5366	149	2.78	5366	84	1.57
	med_nsaids	No	GLP1	3657	292	7.98	3657	276	7.55	3657	656	17.94	3657	144	3.94	3657	48	1.31
	med_nsaids	Yes	DPP4	683	101	14.79	1218	117	9.61	1218	211	17.32	1218	45	3.69	1218	19	1.56
	med_nsaids	Yes	GLP1	994	160	16.1	994	111	11.17	994	220	22.13	994	58	5.84	994	14	1.41
	lab_hba1c_binary	<8.5%	DPP4	2195	241	10.98	4224	313	7.41	4224	653	15.46	4224	118	2.79	4224	68	1.61
	lab_hba1c_binary	<8.5%	GLP1	2902	244	8.41	2902	230	7.93	2902	540	18.61	2902	116	4	2902	34	1.17
	lab_hba1c_binary	>= 8.5%	DPP4	1273	152	11.94	2360	193	8.18	2360	309	13.09	2360	76	3.22	2360	35	1.48
	lab_hba1c_binary	>= 8.5%	GLP1	1749	208	11.89	1749	157	8.98	1749	336	19.21	1749	86	4.92	1749	28	1.6
	lab_bmi_binary	<30 kg/m2	DPP4	1755	170	9.69	3054	248	8.12	3054	434	14.21	3054	77	2.52	3054	45	1.47
	lab_bmi_binary	<30 kg/m2	GLP1	1107	105	9.49	1107	104	9.39	1107	222	20.05	1107	34	3.07	1107	17	1.54
	lab_bmi_binary	<30 kg/m2	DPP4	1713	223	13.02	3530	258	7.31	3530	528	14.96	3530	117	3.31	3530	58	1.64
	lab_bmi_binary	<30 kg/m2	GLP1	3544	347	9.79	3544	283	7.99	3544	654	18.45	3544	168	4.74	3544	45	1.27
	pre_visits_sleep_disorders	No	DPP4	2912	312	10.71	5232	371	7.09	5232	688	13.15	5232	137	2.62	5232	74	1.41
	pre_visits_sleep_disorders	No	GLP1	3542	307	8.67	3542	271	7.65	3542	589	16.63	3542	139	3.92	3542	48	1.36
	pre_visits_sleep_disorders	Yes	DPP4	556	81	14.57	1352	135	9.99	1352	274	20.27	1352	57	4.22	1352	29	2.14
	pre_visits_sleep_disorders	Yes	GLP1	1109	145	13.07	1109	116	10.46	1109	287	25.88	1109	63	5.68	1109	14	1.26
	any_aht_medications	No	DPP4	1084	120	11.07	1868	117	6.26	1868	239	12.79	1868	56	3	1868	24	1.28
	any_aht_medications	No	GLP1	1849	182	9.84	1849	121	6.54	1849	327	17.69	1849	64	3.46	1849	23	1.24
	any_aht_medications	Yes	DPP4	2384	273	11.45	4716	389	8.25	4716	723	15.33	4716	138	2.93	4716	79	1.68
	any_aht_medications	Yes	GLP1	2802	270	9.64	2802	266	9.49	2802	549	19.59	2802	138	4.93	2802	39	1.39
UTSW	Age <65 years	Age <65 years	DPP4	432	14	3.24	432	13	3.01	432	15	3.47	432	< 10	1.62	432	< 10	0
	Age <65 years	Age <65 years	GLP1	2338	44	1.88	2338	30	1.28	2338	61	2.61	2338	28	1.2	2338	11	0.47
	Age >= 65 years	Age >= 65 years	DPP4	607	16	2.64	607	22	3.62	607	28	4.61	607	< 10	1.32	607	10	1.65
	Age >= 65 years	Age >= 65 years	GLP1	1224	26	2.12	1224	36	2.94	1224	57	4.66	1224	19	1.55	1224	6	0.49
	gender_binary	Female	DPP4	493	12	2.43	493	16	3.25	493	21	4.26	493	< 10	1.22	493	< 10	0
	gender_binary	Female	GLP1	2016	36	1.79	2016	41	2.03	2016	71	3.52	2016	35	1.74	2016	< 10	0
	gender_binary	Male	DPP4	546	18	3.3	546	19	3.48	546	22	4.03	546	< 10	1.65	546	< 10	0
	gender_binary	Male	GLP1	1546	34	2.2	1546	25	1.62	1546	47	3.04	1546	12	0.78	1546	< 10	0
	ethnicity_binary	Non-Hispanic	DPP4	236	< 10	0	236	8	3.39	236	< 10	0	236	< 10	1.27	236	< 10	0
	ethnicity_binary	Non-Hispanic	GLP1	743	13	1.75	743	13	1.75	743	23	3.1	743	15	2.02	743	< 10	0
	ethnicity_binary	Hispanic	DPP4	803	25	3.11	803	27	3.36	803	34	4.23	803	12	1.49	803	10	1.25
	ethnicity_binary	Hispanic	GLP1	2819	57	2.02	2819	53	1.88	2819	95	3.37	2819	32	1.14	2819	12	0.43
	medical_chronic_kidney_disease	No	DPP4	1039	30	2.89	1039	35	3.37	1039	43	4.14	1039	15	1.44	1039	13	1.25
	medical_chronic_kidney_disease	No	GLP1	3562	70	1.97	3562	66	1.85	3562	118	3.31	3562	47	1.32	3562	17	0.48
	medical_chronic_kidney_disease	Yes	DPP4	< 10	< 10	0	< 10	< 10	0	< 10	< 10	0	< 10	< 10	0	< 10	< 10	0
	medical_chronic_kidney_disease	Yes	GLP1	< 10	< 10	0	< 10	< 10	0	< 10	< 10	0	< 10	< 10	0	< 10	< 10	0
	medical_coronary_atherosclerosis_and_other_heart_disease	No	DPP4	1004	30	2.99	1004	35	3.49	1004	43	4.28	1004	15	1.49	1004	13	1.29
	medical_coronary_atherosclerosis_and_other_heart_disease	No	GLP1	3493	69	1.98	3493	63	1.8	3493	117	3.35	3493	46	1.32	3493	17	0.49
	medical_coronary_atherosclerosis_and_other_heart_disease	Yes	DPP4	35	< 10	0	35	< 10	0	35	< 10	0	35	< 10	0	35	< 10	0
	medical_coronary_atherosclerosis_and_other_heart_disease	Yes	GLP1	69	< 10	0	69	3	4.35	69	< 10	0	69	< 10	1.45	69	< 10	0
	medical_cerebrovascular_disease	No	DPP4	971	28	2.88	971	32	3.3	971	41	4.22	971	15	1.54	971	11	1.13
	medical_cerebrovascular_disease	No	GLP1	3364	66	1.96	3364	60	1.78	3364	107	3.18	3364	44	1.31	3364	15	0.45
	medical_cerebrovascular_disease	Yes	DPP4	68	< 10	0	68	3	4.41	68	< 10	0	68	0	0	68	< 10	2.94
	medical_cerebrovascular_disease	Yes	GLP1	198	< 10	0	198	6	3.03	198	11	5.56	198	< 10	1.52	198	< 11	1.01
	medical_hypertension	No	DPP4	1039	30	2.89	1039	35	3.37	1039	43	4.14	1039	15	1.44	1039	13	1.25
	medical_hypertension	No	GLP1	3562	70	1.97	3562	66	1.85	3562	118	3.31	3562	47	1.32	3562	17	0.48
	medical_hypertension	Yes	DPP4	< 10	< 10	0	< 10	< 10	0	< 10	< 10	0	< 10	< 10	0	< 10	< 10	0
	medical_hypertension	Yes	GLP1	< 10	< 10	0	< 10	< 10	0	< 10	< 10	0	< 10	< 10	0	< 10	< 10	0
	medical_obesity	No	DPP4	1039	30	2.89	1039	35	3.37	1039	43	4.14	1039	15	1.44	1039	13	1.25
	medical_obesity	No	GLP1	3562	70	1.97	3562	66	1.85	3562	118	3.31	3562	47	1.32	3562	17	0.48
	medical_obesity	Yes	DPP4	< 10	< 10	0	< 10	< 10	0	< 10	< 10	0	< 10	< 10	0	< 10	< 10	0
	medical_obesity	Yes	GLP1	< 10	< 10	0	< 10	< 10	0	< 10	< 10	0	< 10	< 10	0	< 10	< 10	0
	med_insulin	No	DPP4	764	23	3.01	764	25	3.27	764	27	3.53	764	12	1.57	764	< 10	0.65
	med_insulin	No	GLP1	2773	49	1.77	2773	50	1.8	2773	85	3.07	2773	34	1.23	2773	13	0.47
	med_insulin	Yes	DPP4	275	< 10	0	275	10	3.64	275	16	5.82	275	< 10	1.09	275	< 10	0
	med_insulin	Yes	GLP1	789	21	2.66	789	16	2.03	789	33	4.18	789	13	1.65	789	< 10	0
	med_metformin	No	DPP4	590	21	3.56	590	20	3.39	590	27	4.58	590	< 10	1.53	590	< 10	0
	med_metformin	No	GLP1	2157	43	1.99	2157	44	2.04	2157	77	3.57	2157	28	1.3	2157	10	0.46
	med_metformin	Yes	DPP4	449	< 10	0	449	15	3.34	449	16	3.56	449	< 10	1.34	449	< 10	0
	med_metformin	Yes	GLP1	1405	27	1.92	1405	22	1.57	1405	41	2.92	1405	19	1.35	1405	< 10	0
	med_opioids	No	DPP4	702	23	3.28	702	24	3.42	702	31	4.42	702	11	1.57	702	< 10	0
	med_opioids	No	GLP1	2678	53	1.98	2678	46	1.72	2678	86	3.21	2678	38	1.42	2678	12	0.45
	med_opioids	Yes	DPP4	337	< 10	0	337	11	3.26	337	12	3.56	337	< 10	0	337	< 10	0
	med_opioids	Yes	GLP1	884	17	1.92	884	20	2.26	884	32	3.62	884	< 10	0	884	< 10	0
	med_proton_pump_inhibitors	No	DPP4	829	23	2.77	829	30	3.62	829	37	4.46	829	12	1.45	829	11	1.33
	med_proton_pump_inhibitors	No	GLP1	3077	60	1.95	3077	57	1.85	3077	86	2.79	3077	41	1.33	3077	14	0.45
	med_proton_pump_inhibitors	Yes	DPP4	210	< 10	0	210	< 10	0	210	< 10	0	210	< 10	0	210	< 10	0
	med_proton_pump_inhibitors	Yes	GLP1	485	10	2.06	485	< 10	0	485	32	6.6	485	< 10	0	485	< 10	0
	med_lipid	No	DPP4	465	13	2.8	465	11	2.37	465	19	4.09	465	< 10	0	465	< 10	0
	med_lipid	No	GLP1	1924	39	2.03	1924	36	1.87	1924	62	3.22	1924	24	1.25	1924	< 10	0
	med_lipid	Yes	DPP4	574	17	2.96	574	24	4.18	574	24	4.18	574	10	1.74	574	< 10	0
	med_lipid	Yes	GLP1	1638	31	1.89	1638	30	1.83	1638	56	3.42	1638	23	1.4	1638	< 10	0
	med_nsaids	No	DPP4	855	27	3.16	855	30	3.51	855	36	4.21	855	13	1.52	855	13	1.52
	med_nsaids	No	GLP1	2772	50	1.8	2772	43	1.55	2772	85	3.07	2772	33	1.19	2772	13	0.47
	med_nsaids	Yes	DPP4	184	< 10	0	184	< 10	0	184	< 10	0	184	< 10	0	184	< 10	0
	med_nsaids	Yes	GLP1	790	20	2.53	790	23	2.91	790	33	4.18	790	14	1.77	790	< 10	0
	lab_hba1c_binary	<8.5%	DPP4	829	26	3.14	829	28	3.38	829	34	4.1	829	11	1.33	829	< 10	0
	lab_hba1c_binary	<8.5%	GLP1	2763	56	2.03	2763	49	1.77	2763	97	3.51	2763	34	1.23	2763	14	0.51
	lab_hba1c_binary	>= 8.5%	DPP4	210	< 10	0	210	< 10	0	210	< 10	0	210	< 10	0	210	< 10	0
	lab_hba1c_binary	>= 8.5%	GLP1	799	14	1.75	799	17	2.13	799	21	2.63	799	13	1.63	799	< 10	0
	lab_bmi_binary	<30 kg/m2	DPP4	231	< 10	0	231	< 10	0	231	< 10	0	231	< 10	0	231	< 10	0
	lab_bmi_binary	<30 kg/m2	GLP1	357	< 10	0	357	< 10	0	357	12	3.36	357	< 10	0	357	< 10	0
	lab_bmi_binary	<30 kg/m2	DPP4	808	25	3.09	808	26	3.22	808	35	4.33	808	11	1.36	808	10	1.24
	lab_bmi_binary	<30 kg/m2	GLP1	3205	61	1.9	3205	57	1.78	3205	106	3.31	3205	44	1.37	3205	15	0.47
	pre_visits_sleep_disorders	No	DPP4	844	24	2.84	844	29	3.44	844	35	4.15	844	14	1.66	844	13	1.54
	pre_visits_sleep_disorders	No	GLP1	2493	41	1.64	2493	35	1.4	2493	71	2.85	2493	30	1.2	2493	11	0.44
	pre_visits_sleep_disorders	Yes	DPP4	195	< 10	0	195	< 10	0	195	< 10	0	195	< 10	0	195	< 10	0
	pre_visits_sleep_disorders	Yes	GLP1	1069	29	2.71	1069	31	2.9	1069	47	4.4	1069	17	1.59	1069	< 10	0
	any_aht_medications	No	DPP4	318	< 10	0	318	< 10	0	318	15	4.72	318	< 10	0	318	< 10	0
	any_aht_medications	No	GLP1	1513	26	1.72	1513	23	1.52	1513	46	3.04	1513	19	1.26	1513	< 10	0
	any_aht_medications	Yes	DPP4	721	21	2.91	721	32	4.44	721	28	3.88	721	11	1.53	721	12	1.66
	any_aht_medications	Yes	GLP1	2049	44	2.15	2049	43	2.1	2049	72	3.51	2049	28	1.37	2049	11	0.54

## Sheet: GLP1 vs SGLT2
				Abdominal Pain			Constipation			GERD			Nausea			Vomiting
	Modifier	Definition	Treatment	N	Events	Event_pct	N	Events	Event_pct	N	Events	Event_pct	N	Events	Event_pct	N	Events	Event_pct
UPHS	Age	Age <65 years	SGLT2	4883	373	7.64	4883	271	5.55	4883	728	14.91	4883	138	2.83	4883	91	1.86
	Age	Age <65 years	GLP1	5590	616	11.02	5590	423	7.57	5590	1067	19.09	5590	257	4.6	5590	153	2.74
	Age	Age >= 65 years	SGLT2	4830	283	5.86	4830	329	6.81	4830	809	16.75	4830	90	1.86	4830	96	1.99
	Age	Age >= 65 years	GLP1	2412	227	9.41	2412	229	9.49	2412	556	23.05	2412	82	3.4	2412	58	2.4
	gender_binary	Female	SGLT2	3503	322	9.19	3503	255	7.28	3503	608	17.36	3503	118	3.37	3503	86	2.46
	gender_binary	Female	GLP1	4357	558	12.81	4357	415	9.52	4357	952	21.85	4357	242	5.55	4357	132	3.03
	gender_binary	Male	SGLT2	6210	334	5.38	6210	345	5.56	6210	929	14.96	6210	110	1.77	6210	101	1.63
	gender_binary	Male	GLP1	3645	285	7.82	3645	237	6.5	3645	671	18.41	3645	97	2.66	3645	79	2.17
	ethnicity_binary	Non-Hispanic	SGLT2	518	55	10.62	518	33	6.37	518	90	17.37	518	13	2.51	518	12	2.32
	ethnicity_binary	Non-Hispanic	GLP1	396	52	13.13	396	38	9.6	396	75	18.94	396	18	4.55	396	16	4.04
	ethnicity_binary	Hispanic	SGLT2	9195	601	6.54	9195	567	6.17	9195	1447	15.74	9195	215	2.34	9195	175	1.9
	ethnicity_binary	Hispanic	GLP1	7606	791	10.4	7606	614	8.07	7606	1548	20.35	7606	321	4.22	7606	195	2.56
	medical_chronic_kidney_disease	No	SGLT2	7809	505	6.47	7809	421	5.39	7809	1238	15.85	7809	173	2.22	7809	140	1.79
	medical_chronic_kidney_disease	No	GLP1	7239	746	10.31	7239	561	7.75	7239	1440	19.89	7239	300	4.14	7239	176	2.43
	medical_chronic_kidney_disease	Yes	SGLT2	1904	151	7.93	1904	179	9.4	1904	299	15.7	1904	55	2.89	1904	47	2.47
	medical_chronic_kidney_disease	Yes	GLP1	763	97	12.71	763	91	11.93	763	183	23.98	763	39	5.11	763	35	4.59
	medical_coronary_atherosclerosis_and_other_heart_disease	No	SGLT2	7074	463	6.55	7074	388	5.48	7074	1078	15.24	7074	164	2.32	7074	116	1.64
	medical_coronary_atherosclerosis_and_other_heart_disease	No	GLP1	6924	730	10.54	6924	566	8.17	6924	1394	20.13	6924	297	4.29	6924	181	2.61
	medical_coronary_atherosclerosis_and_other_heart_disease	Yes	SGLT2	2639	193	7.31	2639	212	8.03	2639	459	17.39	2639	64	2.43	2639	71	2.69
	medical_coronary_atherosclerosis_and_other_heart_disease	Yes	GLP1	1078	113	10.48	1078	86	7.98	1078	229	21.24	1078	42	3.9	1078	30	2.78
	medical_cerebrovascular_disease	No	SGLT2	8960	599	6.69	8960	514	5.74	8960	1422	15.87	8960	210	2.34	8960	161	1.8
	medical_cerebrovascular_disease	No	GLP1	7653	801	10.47	7653	614	8.02	7653	1554	20.31	7653	318	4.16	7653	191	2.5
	medical_cerebrovascular_disease	Yes	SGLT2	753	57	7.57	753	86	11.42	753	115	15.27	753	18	2.39	753	26	3.45
	medical_cerebrovascular_disease	Yes	GLP1	349	42	12.03	349	38	10.89	349	69	19.77	349	21	6.02	349	20	5.73
	medical_hypertension	No	SGLT2	2380	155	6.51	2380	109	4.58	2380	381	16.01	2380	57	2.39	2380	39	1.64
	medical_hypertension	No	GLP1	2458	248	10.09	2458	162	6.59	2458	457	18.59	2458	102	4.15	2458	60	2.44
	medical_hypertension	Yes	SGLT2	7333	501	6.83	7333	491	6.7	7333	1156	15.76	7333	171	2.33	7333	148	2.02
	medical_hypertension	Yes	GLP1	5544	595	10.73	5544	490	8.84	5544	1166	21.03	5544	237	4.27	5544	151	2.72
	medical_obesity	No	SGLT2	7022	460	6.55	7022	419	5.97	7022	1117	15.91	7022	153	2.18	7022	116	1.65
	medical_obesity	No	GLP1	4189	412	9.84	4189	337	8.04	4189	863	20.6	4189	185	4.42	4189	108	2.58
	medical_obesity	Yes	SGLT2	2691	196	7.28	2691	181	6.73	2691	420	15.61	2691	75	2.79	2691	71	2.64
	medical_obesity	Yes	GLP1	3813	431	11.3	3813	315	8.26	3813	760	19.93	3813	154	4.04	3813	103	2.7
	med_insulin	No	SGLT2	6817	374	5.49	6817	315	4.62	6817	1038	15.23	6817	127	1.86	6817	87	1.28
	med_insulin	No	GLP1	5692	520	9.14	5692	394	6.92	5692	1132	19.89	5692	215	3.78	5692	121	2.13
	med_insulin	Yes	SGLT2	2896	282	9.74	2896	285	9.84	2896	499	17.23	2896	101	3.49	2896	100	3.45
	med_insulin	Yes	GLP1	2310	323	13.98	2310	258	11.17	2310	491	21.26	2310	124	5.37	2310	90	3.9
	med_metformin	No	SGLT2	4128	288	6.98	4128	280	6.78	4128	638	15.46	4128	90	2.18	4128	84	2.03
	med_metformin	No	GLP1	3200	302	9.44	3200	250	7.81	3200	647	20.22	3200	121	3.78	3200	85	2.66
	med_metformin	Yes	SGLT2	5585	368	6.59	5585	320	5.73	5585	899	16.1	5585	138	2.47	5585	103	1.84
	med_metformin	Yes	GLP1	4802	541	11.27	4802	402	8.37	4802	976	20.32	4802	218	4.54	4802	126	2.62
	med_opioids	No	SGLT2	7383	430	5.82	7383	374	5.07	7383	1127	15.26	7383	145	1.96	7383	121	1.64
	med_opioids	No	GLP1	6371	590	9.26	6371	459	7.2	6371	1225	19.23	6371	232	3.64	6371	145	2.28
	med_opioids	Yes	SGLT2	2330	226	9.7	2330	226	9.7	2330	410	17.6	2330	83	3.56	2330	66	2.83
	med_opioids	Yes	GLP1	1631	253	15.51	1631	193	11.83	1631	398	24.4	1631	107	6.56	1631	66	4.05
	med_proton_pump_inhibitors	No	SGLT2	8102	499	6.16	8102	447	5.52	8102	1002	12.37	8102	180	2.22	8102	135	1.67
	med_proton_pump_inhibitors	No	GLP1	6769	650	9.6	6769	503	7.43	6769	1086	16.04	6769	259	3.83	6769	152	2.25
	med_proton_pump_inhibitors	Yes	SGLT2	1611	157	9.75	1611	153	9.5	1611	535	33.21	1611	48	2.98	1611	52	3.23
	med_proton_pump_inhibitors	Yes	GLP1	1233	193	15.65	1233	149	12.08	1233	537	43.55	1233	80	6.49	1233	59	4.79
	med_lipid	No	SGLT2	2675	192	7.18	2675	143	5.35	2675	387	14.47	2675	62	2.32	2675	41	1.53
	med_lipid	No	GLP1	2961	313	10.57	2961	187	6.32	2961	546	18.44	2961	125	4.22	2961	72	2.43
	med_lipid	Yes	SGLT2	7038	464	6.59	7038	457	6.49	7038	1150	16.34	7038	166	2.36	7038	146	2.07
	med_lipid	Yes	GLP1	5041	530	10.51	5041	465	9.22	5041	1077	21.36	5041	214	4.25	5041	139	2.76
	med_nsaids	No	SGLT2	7944	485	6.11	7944	446	5.61	7944	1187	14.94	7944	161	2.03	7944	134	1.69
	med_nsaids	No	GLP1	5962	537	9.01	5962	423	7.09	5962	1117	18.74	5962	218	3.66	5962	131	2.2
	med_nsaids	Yes	SGLT2	1769	171	9.67	1769	154	8.71	1769	350	19.79	1769	67	3.79	1769	53	3
	med_nsaids	Yes	GLP1	2040	306	15	2040	229	11.23	2040	506	24.8	2040	121	5.93	2040	80	3.92
	lab_hba1c_binary	<8.5%	SGLT2	6731	395	5.87	6731	394	5.85	6731	1035	15.38	6731	123	1.83	6731	115	1.71
	lab_hba1c_binary	<8.5%	GLP1	5320	478	8.98	5320	405	7.61	5320	1084	20.38	5320	197	3.7	5320	108	2.03
	lab_hba1c_binary	>= 8.5%	SGLT2	2982	261	8.75	2982	206	6.91	2982	502	16.83	2982	105	3.52	2982	72	2.41
	lab_hba1c_binary	>= 8.5%	GLP1	2682	365	13.61	2682	247	9.21	2682	539	20.1	2682	142	5.29	2682	103	3.84
	lab_bmi_binary	<30 kg/m2	SGLT2	3914	258	6.59	3914	239	6.11	3914	582	14.87	3914	80	2.04	3914	73	1.87
	lab_bmi_binary	<30 kg/m2	GLP1	1541	154	9.99	1541	133	8.63	1541	319	20.7	1541	76	4.93	1541	44	2.86
	lab_bmi_binary	<30 kg/m2	SGLT2	5799	398	6.86	5799	361	6.23	5799	955	16.47	5799	148	2.55	5799	114	1.97
	lab_bmi_binary	<30 kg/m2	GLP1	6461	689	10.66	6461	519	8.03	6461	1304	20.18	6461	263	4.07	6461	167	2.58
	pre_visits_sleep_disorders	No	SGLT2	7809	517	6.62	7809	457	5.85	7809	1201	15.38	7809	181	2.32	7809	133	1.7
	pre_visits_sleep_disorders	No	GLP1	6153	611	9.93	6153	462	7.51	6153	1181	19.19	6153	235	3.82	6153	151	2.45
	pre_visits_sleep_disorders	Yes	SGLT2	1904	139	7.3	1904	143	7.51	1904	336	17.65	1904	47	2.47	1904	54	2.84
	pre_visits_sleep_disorders	Yes	GLP1	1849	232	12.55	1849	190	10.28	1849	442	23.9	1849	104	5.62	1849	60	3.24
	any_aht_medications	No	SGLT2	2191	136	6.21	2191	92	4.2	2191	323	14.74	2191	53	2.42	2191	28	1.28
	any_aht_medications	No	GLP1	2515	251	9.98	2515	161	6.4	2515	453	18.01	2515	93	3.7	2515	57	2.27
	any_aht_medications	Yes	SGLT2	7522	520	6.91	7522	508	6.75	7522	1214	16.14	7522	175	2.33	7522	159	2.11
	any_aht_medications	Yes	GLP1	5487	592	10.79	5487	491	8.95	5487	1170	21.32	5487	246	4.48	5487	154	2.81
YNHHS	Age <65 years	Age <65 years	SGLT2	4200	687	16.36	4200	448	10.67	4200	857	20.4	4200	304	7.24	4200	198	4.71
	Age <65 years	Age <65 years	GLP1	6464	1124	17.39	6464	658	10.18	6464	1333	20.62	6464	560	8.66	6464	318	4.92
	Age >= 65 years	Age >= 65 years	SGLT2	3904	525	13.45	3904	534	13.68	3904	913	23.39	3904	204	5.23	3904	225	5.76
	Age >= 65 years	Age >= 65 years	GLP1	2724	400	14.68	2724	419	15.38	2724	737	27.06	2724	173	6.35	2724	169	6.2
	gender_binary	Female	SGLT2	2941	525	17.85	2941	454	15.44	2941	673	22.88	2941	251	8.53	2941	168	5.71
	gender_binary	Female	GLP1	5175	963	18.61	5175	646	12.48	5175	1188	22.96	5175	518	10.01	5175	290	5.6
	gender_binary	Male	SGLT2	5163	687	13.31	5163	528	10.23	5163	1097	21.25	5163	257	4.98	5163	255	4.94
	gender_binary	Male	GLP1	4013	561	13.98	4013	431	10.74	4013	882	21.98	4013	215	5.36	4013	197	4.91
	ethnicity_binary	Non-Hispanic	SGLT2	1485	264	17.78	1485	197	13.27	1485	288	19.39	1485	104	7	1485	65	4.38
	ethnicity_binary	Non-Hispanic	GLP1	1737	348	20.03	1737	207	11.92	1737	340	19.57	1737	164	9.44	1737	83	4.78
	ethnicity_binary	Hispanic	SGLT2	6619	948	14.32	6619	785	11.86	6619	1482	22.39	6619	404	6.1	6619	358	5.41
	ethnicity_binary	Hispanic	GLP1	7451	1176	15.78	7451	870	11.68	7451	1730	23.22	7451	569	7.64	7451	404	5.42
	medical_chronic_kidney_disease	No	SGLT2	6805	1032	15.17	6805	775	11.39	6805	1467	21.56	6805	437	6.42	6805	316	4.64
	medical_chronic_kidney_disease	No	GLP1	8429	1372	16.28	8429	904	10.72	8429	1829	21.7	8429	671	7.96	8429	416	4.94
	medical_chronic_kidney_disease	Yes	SGLT2	1299	180	13.86	1299	207	15.94	1299	303	23.33	1299	71	5.47	1299	107	8.24
	medical_chronic_kidney_disease	Yes	GLP1	759	152	20.03	759	173	22.79	759	241	31.75	759	62	8.17	759	71	9.35
	medical_coronary_atherosclerosis_and_other_heart_disease	No	SGLT2	5796	854	14.73	5796	624	10.77	5796	1190	20.53	5796	351	6.06	5796	257	4.43
	medical_coronary_atherosclerosis_and_other_heart_disease	No	GLP1	7987	1310	16.4	7987	878	10.99	7987	1739	21.77	7987	631	7.9	7987	389	4.87
	medical_coronary_atherosclerosis_and_other_heart_disease	Yes	SGLT2	2308	358	15.51	2308	358	15.51	2308	580	25.13	2308	157	6.8	2308	166	7.19
	medical_coronary_atherosclerosis_and_other_heart_disease	Yes	GLP1	1201	214	17.82	1201	199	16.57	1201	331	27.56	1201	102	8.49	1201	98	8.16
	medical_cerebrovascular_disease	No	SGLT2	7537	1124	14.91	7537	907	12.03	7537	1636	21.71	7537	471	6.25	7537	393	5.21
	medical_cerebrovascular_disease	No	GLP1	8785	1451	16.52	8785	1012	11.52	8785	1966	22.38	8785	704	8.01	8785	440	5.01
	medical_cerebrovascular_disease	Yes	SGLT2	567	88	15.52	567	75	13.23	567	134	23.63	567	37	6.53	567	30	5.29
	medical_cerebrovascular_disease	Yes	GLP1	403	73	18.11	403	65	16.13	403	104	25.81	403	29	7.2	403	47	11.66
	medical_hypertension	No	SGLT2	1633	212	12.98	1633	154	9.43	1633	315	19.29	1633	99	6.06	1633	58	3.55
	medical_hypertension	No	GLP1	2806	446	15.89	2806	260	9.27	2806	542	19.32	2806	222	7.91	2806	135	4.81
	medical_hypertension	Yes	SGLT2	6471	1000	15.45	6471	828	12.8	6471	1455	22.48	6471	409	6.32	6471	365	5.64
	medical_hypertension	Yes	GLP1	6382	1078	16.89	6382	817	12.8	6382	1528	23.94	6382	511	8.01	6382	352	5.52
	medical_obesity	No	SGLT2	5735	802	13.98	5735	644	11.23	5735	1247	21.74	5735	341	5.95	5735	279	4.86
	medical_obesity	No	GLP1	4358	713	16.36	4358	500	11.47	4358	989	22.69	4358	341	7.82	4358	239	5.48
	medical_obesity	Yes	SGLT2	2369	410	17.31	2369	338	14.27	2369	523	22.08	2369	167	7.05	2369	144	6.08
	medical_obesity	Yes	GLP1	4830	811	16.79	4830	577	11.95	4830	1081	22.38	4830	392	8.12	4830	248	5.13
	med_insulin	No	SGLT2	5355	759	14.17	5355	563	10.51	5355	1158	21.62	5355	312	5.83	5355	217	4.05
	med_insulin	No	GLP1	6550	985	15.04	6550	655	10	6550	1401	21.39	6550	489	7.47	6550	258	3.94
	med_insulin	Yes	SGLT2	2749	453	16.48	2749	419	15.24	2749	612	22.26	2749	196	7.13	2749	206	7.49
	med_insulin	Yes	GLP1	2638	539	20.43	2638	422	16	2638	669	25.36	2638	244	9.25	2638	229	8.68
	med_metformin	No	SGLT2	3493	520	14.89	3493	477	13.66	3493	822	23.53	3493	221	6.33	3493	213	6.1
	med_metformin	No	GLP1	4358	736	16.89	4358	552	12.67	4358	1065	24.44	4358	334	7.66	4358	235	5.39
	med_metformin	Yes	SGLT2	4611	692	15.01	4611	505	10.95	4611	948	20.56	4611	287	6.22	4611	210	4.55
	med_metformin	Yes	GLP1	4830	788	16.31	4830	525	10.87	4830	1005	20.81	4830	399	8.26	4830	252	5.22
	med_opioids	No	SGLT2	5978	834	13.95	5978	637	10.66	5978	1276	21.34	5978	340	5.69	5978	263	4.4
	med_opioids	No	GLP1	7258	1129	15.56	7258	784	10.8	7258	1593	21.95	7258	557	7.67	7258	358	4.93
	med_opioids	Yes	SGLT2	2126	378	17.78	2126	345	16.23	2126	494	23.24	2126	168	7.9	2126	160	7.53
	med_opioids	Yes	GLP1	1930	395	20.47	1930	293	15.18	1930	477	24.72	1930	176	9.12	1930	129	6.68
	med_proton_pump_inhibitors	No	SGLT2	7257	1057	14.57	7257	830	11.44	7257	1435	19.77	7257	435	5.99	7257	363	5
	med_proton_pump_inhibitors	No	GLP1	8363	1360	16.26	8363	958	11.46	8363	1719	20.55	8363	639	7.64	8363	435	5.2
	med_proton_pump_inhibitors	Yes	SGLT2	847	155	18.3	847	152	17.95	847	335	39.55	847	73	8.62	847	60	7.08
	med_proton_pump_inhibitors	Yes	GLP1	825	164	19.88	825	119	14.42	825	351	42.55	825	94	11.39	825	52	6.3
	med_lipid	No	SGLT2	2595	413	15.92	2595	322	12.41	2595	577	22.24	2595	197	7.59	2595	150	5.78
	med_lipid	No	GLP1	4243	784	18.48	4243	457	10.77	4243	985	23.21	4243	361	8.51	4243	215	5.07
	med_lipid	Yes	SGLT2	5509	799	14.5	5509	660	11.98	5509	1193	21.66	5509	311	5.65	5509	273	4.96
	med_lipid	Yes	GLP1	4945	740	14.96	4945	620	12.54	4945	1085	21.94	4945	372	7.52	4945	272	5.5
	med_nsaids	No	SGLT2	6375	867	13.6	6375	724	11.36	6375	1370	21.49	6375	366	5.74	6375	308	4.83
	med_nsaids	No	GLP1	6649	1010	15.19	6649	735	11.05	6649	1480	22.26	6649	483	7.26	6649	349	5.25
	med_nsaids	Yes	SGLT2	1729	345	19.95	1729	258	14.92	1729	400	23.13	1729	142	8.21	1729	115	6.65
	med_nsaids	Yes	GLP1	2539	514	20.24	2539	342	13.47	2539	590	23.24	2539	250	9.85	2539	138	5.44
	lab_hba1c_binary	<8.5%	SGLT2	5620	800	14.23	5620	672	11.96	5620	1265	22.51	5620	320	5.69	5620	273	4.86
	lab_hba1c_binary	<8.5%	GLP1	6625	1012	15.28	6625	748	11.29	6625	1465	22.11	6625	494	7.46	6625	300	4.53
	lab_hba1c_binary	>= 8.5%	SGLT2	2484	412	16.59	2484	310	12.48	2484	505	20.33	2484	188	7.57	2484	150	6.04
	lab_hba1c_binary	>= 8.5%	GLP1	2563	512	19.98	2563	329	12.84	2563	605	23.61	2563	239	9.33	2563	187	7.3
	lab_bmi_binary	<30 kg/m2	SGLT2	3203	434	13.55	3203	376	11.74	3203	654	20.42	3203	161	5.03	3203	152	4.75
	lab_bmi_binary	<30 kg/m2	GLP1	1417	225	15.88	1417	183	12.91	1417	314	22.16	1417	108	7.62	1417	78	5.5
	lab_bmi_binary	<30 kg/m2	SGLT2	4901	778	15.87	4901	606	12.36	4901	1116	22.77	4901	347	7.08	4901	271	5.53
	lab_bmi_binary	<30 kg/m2	GLP1	7771	1299	16.72	7771	894	11.5	7771	1756	22.6	7771	625	8.04	7771	409	5.26
	pre_visits_sleep_disorders	No	SGLT2	6478	920	14.2	6478	743	11.47	6478	1341	20.7	6478	384	5.93	6478	318	4.91
	pre_visits_sleep_disorders	No	GLP1	6695	1073	16.03	6695	763	11.4	6695	1409	21.05	6695	537	8.02	6695	346	5.17
	pre_visits_sleep_disorders	Yes	SGLT2	1626	292	17.96	1626	239	14.7	1626	429	26.38	1626	124	7.63	1626	105	6.46
	pre_visits_sleep_disorders	Yes	GLP1	2493	451	18.09	2493	314	12.6	2493	661	26.51	2493	196	7.86	2493	141	5.66
	any_aht_medications	No	SGLT2	2013	297	14.75	2013	202	10.03	2013	409	20.32	2013	131	6.51	2013	83	4.12
	any_aht_medications	No	GLP1	3405	571	16.77	3405	346	10.16	3405	724	21.26	3405	270	7.93	3405	182	5.35
	any_aht_medications	Yes	SGLT2	6091	915	15.02	6091	780	12.81	6091	1361	22.34	6091	377	6.19	6091	340	5.58
	any_aht_medications	Yes	GLP1	5783	953	16.48	5783	731	12.64	5783	1346	23.28	5783	463	8.01	5783	305	5.27
Mayo	Age <65 years	Age <65 years	SGLT2	3684	465	12.62	3684	232	6.3	3684	591	16.04	3684	246	6.68	3684	106	2.88
	Age <65 years	Age <65 years	GLP1	8542	1254	14.68	8542	591	6.92	8542	1484	17.37	8542	625	7.32	8542	320	3.75
	Age >= 65 years	Age >= 65 years	SGLT2	5031	610	12.12	5031	478	9.5	5031	1037	20.61	5031	213	4.23	5031	171	3.4
	Age >= 65 years	Age >= 65 years	GLP1	4976	699	14.05	4976	517	10.39	4976	1163	23.37	4976	324	6.51	4976	193	3.88
	gender_binary	Female	SGLT2	2862	410	14.33	2862	261	9.12	2862	496	17.33	2862	220	7.69	2862	100	3.49
	gender_binary	Female	GLP1	6557	1063	16.21	6557	581	8.86	6557	1252	19.09	6557	563	8.59	6557	268	4.09
	gender_binary	Male	SGLT2	5853	665	11.36	5853	449	7.67	5853	1132	19.34	5853	239	4.08	5853	177	3.02
	gender_binary	Male	GLP1	6961	890	12.79	6961	527	7.57	6961	1395	20.04	6961	386	5.55	6961	245	3.52
	ethnicity_binary	Non-Hispanic	SGLT2	374	49	13.1	374	24	6.42	374	62	16.58	374	26	6.95	374	15	4.01
	ethnicity_binary	Non-Hispanic	GLP1	742	129	17.39	742	60	8.09	742	135	18.19	742	54	7.28	742	20	2.7
	ethnicity_binary	Hispanic	SGLT2	8341	1026	12.3	8341	686	8.22	8341	1566	18.77	8341	433	5.19	8341	262	3.14
	ethnicity_binary	Hispanic	GLP1	12776	1824	14.28	12776	1048	8.2	12776	2512	19.66	12776	895	7.01	12776	493	3.86
	medical_chronic_kidney_disease	No	SGLT2	8715	1075	12.34	8715	710	8.15	8715	1628	18.68	8715	459	5.27	8715	277	3.18
	medical_chronic_kidney_disease	No	GLP1	13518	1953	14.45	13518	1108	8.2	13518	2647	19.58	13518	949	7.02	13518	513	3.79
	medical_chronic_kidney_disease	Yes	SGLT2	< 10	< 10	0	< 10	< 10	0	< 10	< 10	0	< 10	< 10	0	< 10	< 10	0
	medical_chronic_kidney_disease	Yes	GLP1	< 10	< 10	0	< 10	< 10	0	< 10	< 10	0	< 10	< 10	0	< 10	< 10	0
	medical_coronary_atherosclerosis_and_other_heart_disease	No	SGLT2	8715	1075	12.34	8715	710	8.15	8715	1628	18.68	8715	459	5.27	8715	277	3.18
	medical_coronary_atherosclerosis_and_other_heart_disease	No	GLP1	13518	1953	14.45	13518	1108	8.2	13518	2647	19.58	13518	949	7.02	13518	513	3.79
	medical_coronary_atherosclerosis_and_other_heart_disease	Yes	SGLT2	< 10	< 10	0	< 10	< 10	0	< 10	< 10	0	< 10	< 10	0	< 10	< 10	0
	medical_coronary_atherosclerosis_and_other_heart_disease	Yes	GLP1	< 10	< 10	0	< 10	< 10	0	< 10	< 10	0	< 10	< 10	0	< 10	< 10	0
	medical_cerebrovascular_disease	No	SGLT2	8715	1075	12.34	8715	710	8.15	8715	1628	18.68	8715	459	5.27	8715	277	3.18
	medical_cerebrovascular_disease	No	GLP1	13518	1953	14.45	13518	1108	8.2	13518	2647	19.58	13518	949	7.02	13518	513	3.79
	medical_cerebrovascular_disease	Yes	SGLT2	< 10	< 10	0	< 10	< 10	0	< 10	< 10	0	< 10	< 10	0	< 10	< 10	0
	medical_cerebrovascular_disease	Yes	GLP1	< 10	< 10	0	< 10	< 10	0	< 10	< 10	0	< 10	< 10	0	< 10	< 10	0
	medical_hypertension	No	SGLT2	8715	1075	12.34	8715	710	8.15	8715	1628	18.68	8715	459	5.27	8715	277	3.18
	medical_hypertension	No	GLP1	13518	1953	14.45	13518	1108	8.2	13518	2647	19.58	13518	949	7.02	13518	513	3.79
	medical_hypertension	Yes	SGLT2	< 10	< 10	0	< 10	< 10	0	< 10	< 10	0	< 10	< 10	0	< 10	< 10	0
	medical_hypertension	Yes	GLP1	< 10	< 10	0	< 10	< 10	0	< 10	< 10	0	< 10	< 10	0	< 10	< 10	0
	medical_obesity	No	SGLT2	8715	1075	12.34	8715	710	8.15	8715	1628	18.68	8715	459	5.27	8715	277	3.18
	medical_obesity	No	GLP1	13518	1953	14.45	13518	1108	8.2	13518	2647	19.58	13518	949	7.02	13518	513	3.79
	medical_obesity	Yes	SGLT2	< 10	< 10	0	< 10	< 10	0	< 10	< 10	0	< 10	< 10	0	< 10	< 10	0
	medical_obesity	Yes	GLP1	< 10	< 10	0	< 10	< 10	0	< 10	< 10	0	< 10	< 10	0	< 10	< 10	0
	med_insulin	No	SGLT2	8715	1075	12.34	8715	710	8.15	8715	1628	18.68	8715	459	5.27	8715	277	3.18
	med_insulin	No	GLP1	13518	1953	14.45	13518	1108	8.2	13518	2647	19.58	13518	949	7.02	13518	513	3.79
	med_insulin	Yes	SGLT2	< 10	< 10	0	< 10	< 10	0	< 10	< 10	0	< 10	< 10	0	< 10	< 10	0
	med_insulin	Yes	GLP1	< 10	< 10	0	< 10	< 10	0	< 10	< 10	0	< 10	< 10	0	< 10	< 10	0
	med_metformin	No	SGLT2	8715	1075	12.34	8715	710	8.15	8715	1628	18.68	8715	459	5.27	8715	277	3.18
	med_metformin	No	GLP1	13518	1953	14.45	13518	1108	8.2	13518	2647	19.58	13518	949	7.02	13518	513	3.79
	med_metformin	Yes	SGLT2	< 10	< 10	0	< 10	< 10	0	< 10	< 10	0	< 10	< 10	0	< 10	< 10	0
	med_metformin	Yes	GLP1	< 10	< 10	0	< 10	< 10	0	< 10	< 10	0	< 10	< 10	0	< 10	< 10	0
	med_opioids	No	SGLT2	8715	1075	12.34	8715	710	8.15	8715	1628	18.68	8715	459	5.27	8715	277	3.18
	med_opioids	No	GLP1	13518	1953	14.45	13518	1108	8.2	13518	2647	19.58	13518	949	7.02	13518	513	3.79
	med_opioids	Yes	SGLT2	< 10	< 10	0	< 10	< 10	0	< 10	< 10	0	< 10	< 10	0	< 10	< 10	0
	med_opioids	Yes	GLP1	< 10	< 10	0	< 10	< 10	0	< 10	< 10	0	< 10	< 10	0	< 10	< 10	0
	med_proton_pump_inhibitors	No	SGLT2	8715	1075	12.34	8715	710	8.15	8715	1628	18.68	8715	459	5.27	8715	277	3.18
	med_proton_pump_inhibitors	No	GLP1	13518	1953	14.45	13518	1108	8.2	13518	2647	19.58	13518	949	7.02	13518	513	3.79
	med_proton_pump_inhibitors	Yes	SGLT2	< 10	< 10	0	< 10	< 10	0	< 10	< 10	0	< 10	< 10	0	< 10	< 10	0
	med_proton_pump_inhibitors	Yes	GLP1	< 10	< 10	0	< 10	< 10	0	< 10	< 10	0	< 10	< 10	0	< 10	< 10	0
	med_lipid	No	SGLT2	8715	1075	12.34	8715	710	8.15	8715	1628	18.68	8715	459	5.27	8715	277	3.18
	med_lipid	No	GLP1	13518	1953	14.45	13518	1108	8.2	13518	2647	19.58	13518	949	7.02	13518	513	3.79
	med_lipid	Yes	SGLT2	< 10	< 10	0	< 10	< 10	0	< 10	< 10	0	< 10	< 10	0	< 10	< 10	0
	med_lipid	Yes	GLP1	< 10	< 10	0	< 10	< 10	0	< 10	< 10	0	< 10	< 10	0	< 10	< 10	0
	med_nsaids	No	SGLT2	8715	1075	12.34	8715	710	8.15	8715	1628	18.68	8715	459	5.27	8715	277	3.18
	med_nsaids	No	GLP1	13518	1953	14.45	13518	1108	8.2	13518	2647	19.58	13518	949	7.02	13518	513	3.79
	med_nsaids	Yes	SGLT2	< 10	< 10	0	< 10	< 10	0	< 10	< 10	0	< 10	< 10	0	< 10	< 10	0
	med_nsaids	Yes	GLP1	< 10	< 10	0	< 10	< 10	0	< 10	< 10	0	< 10	< 10	0	< 10	< 10	0
	lab_hba1c_binary	<8.5%	SGLT2	6183	705	11.4	6183	489	7.91	6183	1161	18.78	6183	300	4.85	6183	173	2.8
	lab_hba1c_binary	<8.5%	GLP1	9121	1185	12.99	9121	706	7.74	9121	1767	19.37	9121	575	6.3	9121	287	3.15
	lab_hba1c_binary	>= 8.5%	SGLT2	2532	370	14.61	2532	221	8.73	2532	467	18.44	2532	159	6.28	2532	104	4.11
	lab_hba1c_binary	>= 8.5%	GLP1	4397	768	17.47	4397	402	9.14	4397	880	20.01	4397	374	8.51	4397	226	5.14
	lab_bmi_binary	<30 kg/m2	SGLT2	2654	325	12.25	2654	228	8.59	2654	492	18.54	2654	143	5.39	2654	99	3.73
	lab_bmi_binary	<30 kg/m2	GLP1	2155	334	15.5	2155	224	10.39	2155	440	20.42	2155	162	7.52	2155	105	4.87
	lab_bmi_binary	<30 kg/m2	SGLT2	6061	750	12.37	6061	482	7.95	6061	1136	18.74	6061	316	5.21	6061	178	2.94
	lab_bmi_binary	<30 kg/m2	GLP1	11363	1619	14.25	11363	884	7.78	11363	2207	19.42	11363	787	6.93	11363	408	3.59
	pre_visits_sleep_disorders	No	SGLT2	6096	706	11.58	6096	449	7.37	6096	1082	17.75	6096	315	5.17	6096	176	2.89
	pre_visits_sleep_disorders	No	GLP1	8949	1207	13.49	8949	673	7.52	8949	1627	18.18	8949	584	6.53	8949	339	3.79
	pre_visits_sleep_disorders	Yes	SGLT2	2619	369	14.09	2619	261	9.97	2619	546	20.85	2619	144	5.5	2619	101	3.86
	pre_visits_sleep_disorders	Yes	GLP1	4569	746	16.33	4569	435	9.52	4569	1020	22.32	4569	365	7.99	4569	174	3.81
	any_aht_medications	No	SGLT2	8715	1075	12.34	8715	710	8.15	8715	1628	18.68	8715	459	5.27	8715	277	3.18
	any_aht_medications	No	GLP1	13518	1953	14.45	13518	1108	8.2	13518	2647	19.58	13518	949	7.02	13518	513	3.79
	any_aht_medications	Yes	SGLT2	< 10	< 10	0	< 10	< 10	0	< 10	< 10	0	< 10	< 10	0	< 10	< 10	0
	any_aht_medications	Yes	GLP1	< 10	< 10	0	< 10	< 10	0	< 10	< 10	0	< 10	< 10	0	< 10	< 10	0
UFlorida+	Age <65 years	Age <65 years	SGLT2	4208	351	8.34	4208	323	7.68	4208	585	13.9	4208	140	3.33	4208	63	1.5
	Age <65 years	Age <65 years	GLP1	3632	376	10.35	3632	290	7.98	3632	649	17.87	3632	174	4.79	3632	50	1.38
	Age >= 65 years	Age >= 65 years	SGLT2	2376	142	5.98	2376	183	7.7	2376	377	15.87	2376	54	2.27	2376	40	1.68
	Age >= 65 years	Age >= 65 years	GLP1	1019	76	7.46	1019	97	9.52	1019	227	22.28	1019	28	2.75	1019	12	1.18
	gender_binary	Female	SGLT2	2691	254	9.44	2691	252	9.36	2691	402	14.94	2691	112	4.16	2691	40	1.49
	gender_binary	Female	GLP1	2667	323	12.11	2667	261	9.79	2667	551	20.66	2667	156	5.85	2667	44	1.65
	gender_binary	Male	SGLT2	3893	239	6.14	3893	254	6.52	3893	560	14.38	3893	82	2.11	3893	63	1.62
	gender_binary	Male	GLP1	1984	129	6.5	1984	126	6.35	1984	325	16.38	1984	46	2.32	1984	18	0.91
	ethnicity_binary	Non-Hispanic	SGLT2	2447	189	7.72	2447	186	7.6	2447	327	13.36	2447	70	2.86	2447	31	1.27
	ethnicity_binary	Non-Hispanic	GLP1	1607	164	10.21	1607	134	8.34	1607	305	18.98	1607	60	3.73	1607	19	1.18
	ethnicity_binary	Hispanic	SGLT2	4137	304	7.35	4137	320	7.74	4137	635	15.35	4137	124	3	4137	72	1.74
	ethnicity_binary	Hispanic	GLP1	3044	288	9.46	3044	253	8.31	3044	571	18.76	3044	142	4.66	3044	43	1.41
	medical_chronic_kidney_disease	No	SGLT2	5464	421	7.7	5464	404	7.39	5464	772	14.13	5464	164	3	5464	82	1.5
	medical_chronic_kidney_disease	No	GLP1	4225	406	9.61	4225	334	7.91	4225	768	18.18	4225	189	4.47	4225	53	1.25
	medical_chronic_kidney_disease	Yes	SGLT2	1120	72	6.43	1120	102	9.11	1120	190	16.96	1120	30	2.68	1120	21	1.88
	medical_chronic_kidney_disease	Yes	GLP1	426	46	10.8	426	53	12.44	426	108	25.35	426	13	3.05	426	< 10	0
	medical_coronary_atherosclerosis_and_other_heart_disease	No	SGLT2	4673	347	7.43	4673	342	7.32	4673	650	13.91	4673	146	3.12	4673	61	1.31
	medical_coronary_atherosclerosis_and_other_heart_disease	No	GLP1	4090	383	9.36	4090	319	7.8	4090	741	18.12	4090	180	4.4	4090	52	1.27
	medical_coronary_atherosclerosis_and_other_heart_disease	Yes	SGLT2	1911	146	7.64	1911	164	8.58	1911	312	16.33	1911	48	2.51	1911	42	2.2
	medical_coronary_atherosclerosis_and_other_heart_disease	Yes	GLP1	561	69	12.3	561	68	12.12	561	135	24.06	561	22	3.92	561	10	1.78
	medical_cerebrovascular_disease	No	SGLT2	6166	462	7.49	6166	461	7.48	6166	891	14.45	6166	181	2.94	6166	87	1.41
	medical_cerebrovascular_disease	No	GLP1	4478	428	9.56	4478	364	8.13	4478	834	18.62	4478	190	4.24	4478	57	1.27
	medical_cerebrovascular_disease	Yes	SGLT2	418	31	7.42	418	45	10.77	418	71	16.99	418	13	3.11	418	16	3.83
	medical_cerebrovascular_disease	Yes	GLP1	173	24	13.87	173	23	13.29	173	42	24.28	173	12	6.94	173	< 10	0
	medical_hypertension	No	SGLT2	1577	102	6.47	1577	97	6.15	1577	184	11.67	1577	40	2.54	1577	12	0.76
	medical_hypertension	No	GLP1	1496	132	8.82	1496	88	5.88	1496	227	15.17	1496	48	3.21	1496	11	0.74
	medical_hypertension	Yes	SGLT2	5007	391	7.81	5007	409	8.17	5007	778	15.54	5007	154	3.08	5007	91	1.82
	medical_hypertension	Yes	GLP1	3155	320	10.14	3155	299	9.48	3155	649	20.57	3155	154	4.88	3155	51	1.62
	medical_obesity	No	SGLT2	3853	248	6.44	3853	278	7.22	3853	548	14.22	3853	95	2.47	3853	55	1.43
	medical_obesity	No	GLP1	1838	175	9.52	1838	147	8	1838	327	17.79	1838	69	3.75	1838	22	1.2
	medical_obesity	Yes	SGLT2	2731	245	8.97	2731	228	8.35	2731	414	15.16	2731	99	3.63	2731	48	1.76
	medical_obesity	Yes	GLP1	2813	277	9.85	2813	240	8.53	2813	549	19.52	2813	133	4.73	2813	40	1.42
	med_insulin	No	SGLT2	4685	307	6.55	4685	293	6.25	4685	657	14.02	4685	115	2.45	4685	59	1.26
	med_insulin	No	GLP1	3249	276	8.49	3249	221	6.8	3249	575	17.7	3249	122	3.76	3249	36	1.11
	med_insulin	Yes	SGLT2	1899	186	9.79	1899	213	11.22	1899	305	16.06	1899	79	4.16	1899	44	2.32
	med_insulin	Yes	GLP1	1402	176	12.55	1402	166	11.84	1402	301	21.47	1402	80	5.71	1402	26	1.85
	med_metformin	No	SGLT2	2973	221	7.43	2973	231	7.77	2973	447	15.04	2973	85	2.86	2973	62	2.09
	med_metformin	No	GLP1	2029	202	9.96	2029	177	8.72	2029	416	20.5	2029	89	4.39	2029	28	1.38
	med_metformin	Yes	SGLT2	3611	272	7.53	3611	275	7.62	3611	515	14.26	3611	109	3.02	3611	41	1.14
	med_metformin	Yes	GLP1	2622	250	9.53	2622	210	8.01	2622	460	17.54	2622	113	4.31	2622	34	1.3
	med_opioids	No	SGLT2	5231	344	6.58	5231	354	6.77	5231	742	14.18	5231	139	2.66	5231	69	1.32
	med_opioids	No	GLP1	3840	350	9.11	3840	281	7.32	3840	693	18.05	3840	150	3.91	3840	52	1.35
	med_opioids	Yes	SGLT2	1353	149	11.01	1353	152	11.23	1353	220	16.26	1353	55	4.07	1353	34	2.51
	med_opioids	Yes	GLP1	811	102	12.58	811	106	13.07	811	183	22.56	811	52	6.41	811	10	1.23
	med_proton_pump_inhibitors	No	SGLT2	5718	406	7.1	5718	427	7.47	5718	735	12.85	5718	164	2.87	5718	74	1.29
	med_proton_pump_inhibitors	No	GLP1	4204	387	9.21	4204	336	7.99	4204	720	17.13	4204	176	4.19	4204	55	1.31
	med_proton_pump_inhibitors	Yes	SGLT2	866	87	10.05	866	79	9.12	866	227	26.21	866	30	3.46	866	29	3.35
	med_proton_pump_inhibitors	Yes	GLP1	447	65	14.54	447	51	11.41	447	156	34.9	447	26	5.82	447	< 10	0
	med_lipid	No	SGLT2	2286	193	8.44	2286	177	7.74	2286	358	15.66	2286	84	3.67	2286	39	1.71
	med_lipid	No	GLP1	2206	217	9.84	2206	171	7.75	2206	396	17.95	2206	107	4.85	2206	34	1.54
	med_lipid	Yes	SGLT2	4298	300	6.98	4298	329	7.65	4298	604	14.05	4298	110	2.56	4298	64	1.49
	med_lipid	Yes	GLP1	2445	235	9.61	2445	216	8.83	2445	480	19.63	2445	95	3.89	2445	28	1.15
	med_nsaids	No	SGLT2	5366	365	6.8	5366	389	7.25	5366	751	14	5366	149	2.78	5366	84	1.57
	med_nsaids	No	GLP1	3657	292	7.98	3657	276	7.55	3657	656	17.94	3657	144	3.94	3657	48	1.31
	med_nsaids	Yes	SGLT2	1218	128	10.51	1218	117	9.61	1218	211	17.32	1218	45	3.69	1218	19	1.56
	med_nsaids	Yes	GLP1	994	160	16.1	994	111	11.17	994	220	22.13	994	58	5.84	994	14	1.41
	lab_hba1c_binary	<8.5%	SGLT2	4224	299	7.08	4224	313	7.41	4224	653	15.46	4224	118	2.79	4224	68	1.61
	lab_hba1c_binary	<8.5%	GLP1	2902	244	8.41	2902	230	7.93	2902	540	18.61	2902	116	4	2902	34	1.17
	lab_hba1c_binary	>= 8.5%	SGLT2	2360	194	8.22	2360	193	8.18	2360	309	13.09	2360	76	3.22	2360	35	1.48
	lab_hba1c_binary	>= 8.5%	GLP1	1749	208	11.89	1749	157	8.98	1749	336	19.21	1749	86	4.92	1749	28	1.6
	lab_bmi_binary	<30 kg/m2	SGLT2	3054	195	6.39	3054	248	8.12	3054	434	14.21	3054	77	2.52	3054	45	1.47
	lab_bmi_binary	<30 kg/m2	GLP1	1107	105	9.49	1107	104	9.39	1107	222	20.05	1107	34	3.07	1107	17	1.54
	lab_bmi_binary	<30 kg/m2	SGLT2	3530	298	8.44	3530	258	7.31	3530	528	14.96	3530	117	3.31	3530	58	1.64
	lab_bmi_binary	<30 kg/m2	GLP1	3544	347	9.79	3544	283	7.99	3544	654	18.45	3544	168	4.74	3544	45	1.27
	pre_visits_sleep_disorders	No	SGLT2	5232	355	6.79	5232	371	7.09	5232	688	13.15	5232	137	2.62	5232	74	1.41
	pre_visits_sleep_disorders	No	GLP1	3542	307	8.67	3542	271	7.65	3542	589	16.63	3542	139	3.92	3542	48	1.36
	pre_visits_sleep_disorders	Yes	SGLT2	1352	138	10.21	1352	135	9.99	1352	274	20.27	1352	57	4.22	1352	29	2.14
	pre_visits_sleep_disorders	Yes	GLP1	1109	145	13.07	1109	116	10.46	1109	287	25.88	1109	63	5.68	1109	14	1.26
	any_aht_medications	No	SGLT2	1868	138	7.39	1868	117	6.26	1868	239	12.79	1868	56	3	1868	24	1.28
	any_aht_medications	No	GLP1	1849	182	9.84	1849	121	6.54	1849	327	17.69	1849	64	3.46	1849	23	1.24
	any_aht_medications	Yes	SGLT2	4716	355	7.53	4716	389	8.25	4716	723	15.33	4716	138	2.93	4716	79	1.68
	any_aht_medications	Yes	GLP1	2802	270	9.64	2802	266	9.49	2802	549	19.59	2802	138	4.93	2802	39	1.39
UTSW	Age <65 years	Age <65 years	SGLT2	1434	46	3.21	1434	28	1.95	1434	48	3.35	1434	28	1.95	1434	11	0.77
	Age <65 years	Age <65 years	GLP1	2338	44	1.88	2338	30	1.28	2338	61	2.61	2338	28	1.2	2338	11	0.47
	Age >= 65 years	Age >= 65 years	SGLT2	1526	35	2.29	1526	28	1.83	1526	52	3.41	1526	25	1.64	1526	11	0.72
	Age >= 65 years	Age >= 65 years	GLP1	1224	26	2.12	1224	36	2.94	1224	57	4.66	1224	19	1.55	1224	< 10	0
	gender_binary	Female	SGLT2	1163	41	3.53	1163	26	2.24	1163	45	3.87	1163	29	2.49	1163	11	0.95
	gender_binary	Female	GLP1	2016	36	1.79	2016	41	2.03	2016	71	3.52	2016	35	1.74	2016	< 10	0
	gender_binary	Male	SGLT2	1797	40	2.23	1797	30	1.67	1797	55	3.06	1797	24	1.34	1797	11	0.61
	gender_binary	Male	GLP1	1546	34	2.2	1546	25	1.62	1546	47	3.04	1546	12	0.78	1546	< 10	0
	ethnicity_binary	Non-Hispanic	SGLT2	632	19	3.01	632	18	2.85	632	18	2.85	632	11	1.74	632	< 10	0
	ethnicity_binary	Non-Hispanic	GLP1	743	13	1.75	743	13	1.75	743	23	3.1	743	15	2.02	743	< 10	0
	ethnicity_binary	Hispanic	SGLT2	2328	62	2.66	2328	38	1.63	2328	82	3.52	2328	42	1.8	2328	14	0.6
	ethnicity_binary	Hispanic	GLP1	2819	57	2.02	2819	53	1.88	2819	95	3.37	2819	32	1.14	2819	12	0.43
	medical_chronic_kidney_disease	No	SGLT2	2960	81	2.74	2960	56	1.89	2960	100	3.38	2960	53	1.79	2960	22	0.74
	medical_chronic_kidney_disease	No	GLP1	3562	70	1.97	3562	66	1.85	3562	118	3.31	3562	47	1.32	3562	17	0.48
	medical_chronic_kidney_disease	Yes	SGLT2	< 10	< 10	0	< 10	< 10	0	< 10	< 10	0	< 10	< 10	0	< 10	< 10	0
	medical_chronic_kidney_disease	Yes	GLP1	< 10	< 10	0	< 10	< 10	0	< 10	< 10	0	< 10	< 10	0	< 10	< 10	0
	medical_coronary_atherosclerosis_and_other_heart_disease	No	SGLT2	2778	75	2.7	2778	53	1.91	2778	94	3.38	2778	46	1.66	2778	20	0.72
	medical_coronary_atherosclerosis_and_other_heart_disease	No	GLP1	3493	69	1.98	3493	63	1.8	3493	117	3.35	3493	46	1.32	3493	17	0.49
	medical_coronary_atherosclerosis_and_other_heart_disease	Yes	SGLT2	182	< 10	3.3	182	< 10	0	182	6	3.3	182	7	3.85	182	< 10	0
	medical_coronary_atherosclerosis_and_other_heart_disease	Yes	GLP1	69	< 10	1.45	69	< 10	0	69	1	1.45	69	1	1.45	69	0	0
	medical_cerebrovascular_disease	No	SGLT2	2727	73	2.68	2727	53	1.94	2727	93	3.41	2727	50	1.83	2727	19	0.7
	medical_cerebrovascular_disease	No	GLP1	3364	66	1.96	3364	60	1.78	3364	107	3.18	3364	44	1.31	3364	15	0.45
	medical_cerebrovascular_disease	Yes	SGLT2	233	< 10	3.43	233	< 10	0	233	< 10	0	233	< 10	0	233	< 10	0
	medical_cerebrovascular_disease	Yes	GLP1	198	< 10	2.02	198	< 10	0	198	11	5.56	198	< 10	0	198	< 10	0
	medical_hypertension	No	SGLT2	2960	81	2.74	2960	56	1.89	2960	100	3.38	2960	53	1.79	2960	22	0.74
	medical_hypertension	No	GLP1	3562	70	1.97	3562	66	1.85	3562	118	3.31	3562	47	1.32	3562	17	0.48
	medical_hypertension	Yes	SGLT2	< 10	< 10	0	< 10	< 10	0	< 10	< 10	0	< 10	< 10	0	< 10	< 10	0
	medical_hypertension	Yes	GLP1	< 10	< 10	0	< 10	< 10	0	< 10	< 10	0	< 10	< 10	0	< 10	< 10	0
	medical_obesity	No	SGLT2	2960	81	2.74	2960	56	1.89	2960	100	3.38	2960	53	1.79	2960	22	0.74
	medical_obesity	No	GLP1	3562	70	1.97	3562	66	1.85	3562	118	3.31	3562	47	1.32	3562	17	0.48
	medical_obesity	Yes	SGLT2	< 10	< 10	0	< 10	< 10	0	< 10	< 10	0	< 10	< 10	0	< 10	< 10	0
	medical_obesity	Yes	GLP1	< 10	< 10	0	< 10	< 10	0	< 10	< 10	0	< 10	< 10	0	< 10	< 10	0
	med_insulin	No	SGLT2	2112	53	2.51	2112	42	1.99	2112	79	3.74	2112	36	1.7	2112	11	0.52
	med_insulin	No	GLP1	2773	49	1.77	2773	50	1.8	2773	85	3.07	2773	34	1.23	2773	13	0.47
	med_insulin	Yes	SGLT2	848	28	3.3	848	14	1.65	848	21	2.48	848	17	2	848	11	1.3
	med_insulin	Yes	GLP1	789	21	2.66	789	16	2.03	789	33	4.18	789	13	1.65	789	< 10	0
	med_metformin	No	SGLT2	1816	54	2.97	1816	37	2.04	1816	61	3.36	1816	33	1.82	1816	16	0.88
	med_metformin	No	GLP1	2157	43	1.99	2157	44	2.04	2157	77	3.57	2157	28	1.3	2157	10	0.46
	med_metformin	Yes	SGLT2	1144	27	2.36	1144	19	1.66	1144	39	3.41	1144	20	1.75	1144	< 10	0
	med_metformin	Yes	GLP1	1405	27	1.92	1405	22	1.57	1405	41	2.92	1405	19	1.35	1405	< 10	0
	med_opioids	No	SGLT2	2086	57	2.73	2086	37	1.77	2086	67	3.21	2086	35	1.68	2086	16	0.77
	med_opioids	No	GLP1	2678	53	1.98	2678	46	1.72	2678	86	3.21	2678	38	1.42	2678	12	0.45
	med_opioids	Yes	SGLT2	874	24	2.75	874	19	2.17	874	33	3.78	874	18	2.06	874	< 10	0
	med_opioids	Yes	GLP1	884	17	1.92	884	20	2.26	884	32	3.62	884	< 10	0	884	< 10	0
	med_proton_pump_inhibitors	No	SGLT2	2506	69	2.75	2506	46	1.84	2506	75	2.99	2506	45	1.8	2506	17	0.68
	med_proton_pump_inhibitors	No	GLP1	3077	60	1.95	3077	57	1.85	3077	86	2.79	3077	41	1.33	3077	14	0.45
	med_proton_pump_inhibitors	Yes	SGLT2	454	12	2.64	454	10	2.2	454	25	5.51	454	< 10	0	454	< 10	0
	med_proton_pump_inhibitors	Yes	GLP1	485	10	2.06	485	< 10	0	485	32	6.6	485	< 10	0	485	< 10	0
	med_lipid	No	SGLT2	1334	36	2.7	1334	29	2.17	1334	45	3.37	1334	25	1.87	1334	< 10	0
	med_lipid	No	GLP1	1924	39	2.03	1924	36	1.87	1924	62	3.22	1924	24	1.25	1924	< 10	0
	med_lipid	Yes	SGLT2	1626	45	2.77	1626	27	1.66	1626	55	3.38	1626	28	1.72	1626	13	0.8
	med_lipid	Yes	GLP1	1638	31	1.89	1638	30	1.83	1638	56	3.42	1638	23	1.4	1638	< 10	0
	med_nsaids	No	SGLT2	2426	68	2.8	2426	47	1.94	2426	83	3.42	2426	46	1.9	2426	19	0.78
	med_nsaids	No	GLP1	2772	50	1.8	2772	43	1.55	2772	85	3.07	2772	33	1.19	2772	13	0.47
	med_nsaids	Yes	SGLT2	534	13	2.43	534	< 10	0	534	17	3.18	534	< 10	0	534	< 10	0
	med_nsaids	Yes	GLP1	790	20	2.53	790	23	2.91	790	33	4.18	790	14	1.77	790	< 10	0
	lab_hba1c_binary	<8.5%	SGLT2	2341	63	2.69	2341	49	2.09	2341	81	3.46	2341	41	1.75	2341	17	0.73
	lab_hba1c_binary	<8.5%	GLP1	2763	56	2.03	2763	49	1.77	2763	97	3.51	2763	34	1.23	2763	14	0.51
	lab_hba1c_binary	>= 8.5%	SGLT2	619	18	2.91	619	7	1.13	619	19	3.07	619	12	1.94	619	< 10	0
	lab_hba1c_binary	>= 8.5%	GLP1	799	14	1.75	799	17	2.13	799	21	2.63	799	13	1.63	799	< 10	0
	lab_bmi_binary	<30 kg/m2	SGLT2	494	< 10	0	494	< 10	0	494	15	3.04	494	< 10	0	494	< 10	0
	lab_bmi_binary	<30 kg/m2	GLP1	357	< 10	0	357	< 10	0	357	12	3.36	357	< 10	0	357	< 10	0
	lab_bmi_binary	<30 kg/m2	SGLT2	2466	73	2.96	2466	47	1.91	2466	85	3.45	2466	47	1.91	2466	17	0.69
	lab_bmi_binary	<30 kg/m2	GLP1	3205	61	1.9	3205	57	1.78	3205	106	3.31	3205	44	1.37	3205	15	0.47
	pre_visits_sleep_disorders	No	SGLT2	2249	51	2.27	2249	38	1.69	2249	67	2.98	2249	36	1.6	2249	14	0.62
	pre_visits_sleep_disorders	No	GLP1	2493	41	1.64	2493	35	1.4	2493	71	2.85	2493	30	1.2	2493	11	0.44
	pre_visits_sleep_disorders	Yes	SGLT2	711	30	4.22	711	18	2.53	711	33	4.64	711	17	2.39	711	< 10	0
	pre_visits_sleep_disorders	Yes	GLP1	1069	29	2.71	1069	31	2.9	1069	47	4.4	1069	17	1.59	1069	< 10	0
	any_aht_medications	No	SGLT2	926	24	2.59	926	13	1.4	926	26	2.81	926	17	1.84	926	< 10	0
	any_aht_medications	No	GLP1	1513	26	1.72	1513	23	1.52	1513	46	3.04	1513	19	1.26	1513	< 10	0
	any_aht_medications	Yes	SGLT2	2034	57	2.8	2034	43	2.11	2034	74	3.64	2034	36	1.77	2034	18	0.88
	any_aht_medications	Yes	GLP1	2049	44	2.15	2049	43	2.1	2049	72	3.51	2049	28	1.37	2049	11	0.54
